# Supplementary material for: Ruthenium(ii)/acetate catalyzed intermolecular dehydrogenative ortho C–H silylation of 2-aryl N-containing heterocycles
Source: Royal Society of Chemistry journal article supplement (doi:10.1039/c9ob00609e), 2019-01-01

Electronic Supporting Information

**Ruthenium(II) / Acetate Catalyzed Intermolecular  
Dehydrogenative *Ortho* C-H Silylation of 2-Aryl  
*N*-Containing Heterocycles**

Shun liu,<sup>a</sup> Qiao Lin,<sup>a</sup> Chunshu Liao,<sup>a</sup> Jing Chen,<sup>a</sup> Kun Zhang,<sup>a</sup> Qiang Liu,<sup>ab</sup> and Bin Li\*<sup>a</sup>

<sup>a</sup>*School of Biotechnology and Health Sciences, Wuyi University, 22 Dongchengcun, Jiangmen 529020, P. R. China*

<sup>b</sup>*Center of Basic Molecular Science (CBMS), Department of Chemistry, Tsinghua University, Beijing, China*

**Table of Contents**

|     |                                                        |
|-----|--------------------------------------------------------|
| S2  | <i>General remarks</i>                                 |
| S2  | <i>General procedures for C-H silylation reactions</i> |
| S3  | <i>H/D scrambling experiments</i>                      |
| S7  | <i>Isotope Effect of Deuterium-Labeled Substrates</i>  |
| S8  | <i>Characterization data of substrates</i>             |
| S14 | <i><sup>1</sup>H and <sup>13</sup>C NMR Spectra</i>    |

### **General remarks**

All reagents were obtained from commercial sources and used as received. Technical grade petroleum ether (40-60°C bp.) and ethyl acetate were used for chromatography column.

<sup>1</sup>H NMR spectra were recorded in CDCl<sub>3</sub> at ambient temperature on Bruker AVANCE I 300 or 500 spectrometers at 300.1 or 500.1 MHz, using the solvent as internal standard (7.26 ppm). <sup>13</sup>C NMR spectra were obtained at 75 MHz and referenced to the internal solvent signals (central peak is 77.2 ppm). Chemical shift (δ) and coupling constants (*J*) are given in ppm and in Hz, respectively. The peak patterns are indicated as follows: s, singlet; d, doublet; t, triplet; q, quartet; m, multiplet, and br. for broad.

GC analyses were performed with GC-14C (Shimadzu) equipped with a 30-m capillary column (Supelco, SPB-5, fused silica capillary column, 30 M\*0.25 mm\*0.25 mm film thickness), was used with N<sub>2</sub>/air as vector gas. GCMS were measured by GCMS-7890A-5975C (Agilent) with GC-7890A equipped with a 30-m capillary column (HP-5ms, fused silica capillary column, 30 M\*0.25 mm\*0.25 mm film thickness), was used with helium as vector gas. HRMS were measured by MAT 95XP (Termol) (LCMS-IT-TOF).

The following GC conditions were used: initial temperature 80 °C, for 2 minutes, then rate 20 °C/min. until 260 °C and 260°C for 20 minutes.

### **General procedure for Ru(PPh<sub>3</sub>)<sub>3</sub>(CO)HCl catalyzed selective C-H mono-silylation of pyridine derivatives with hydrosilane**

Ru(PPh<sub>3</sub>)<sub>3</sub>(CO)HCl (0.025 mmol, 23.8 mg), pyridines (0.5 mmol), hydrosilane (2.0 mmol), KOAc (0.15 mmol, 15 mg), norbornylene (2.0 mmol, 197 μL) and toluene (1 mL) were introduced in a tube under N<sub>2</sub>, equipped with magnetic stirring bar and was stirred at 120 °C. After 20 h, the conversion of the reaction was analyzed by gas chromatography. The solvent was then evaporated under vacuum and the desired product was purified by using a silica gel chromatography column and a mixture of petrol ether/ethyl acetate as eluent.

## H/D scrambling experiments

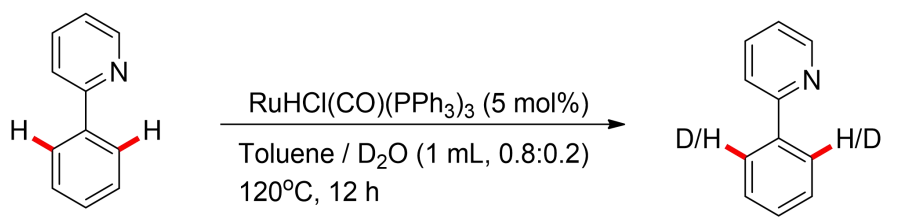

68% H/D exchange

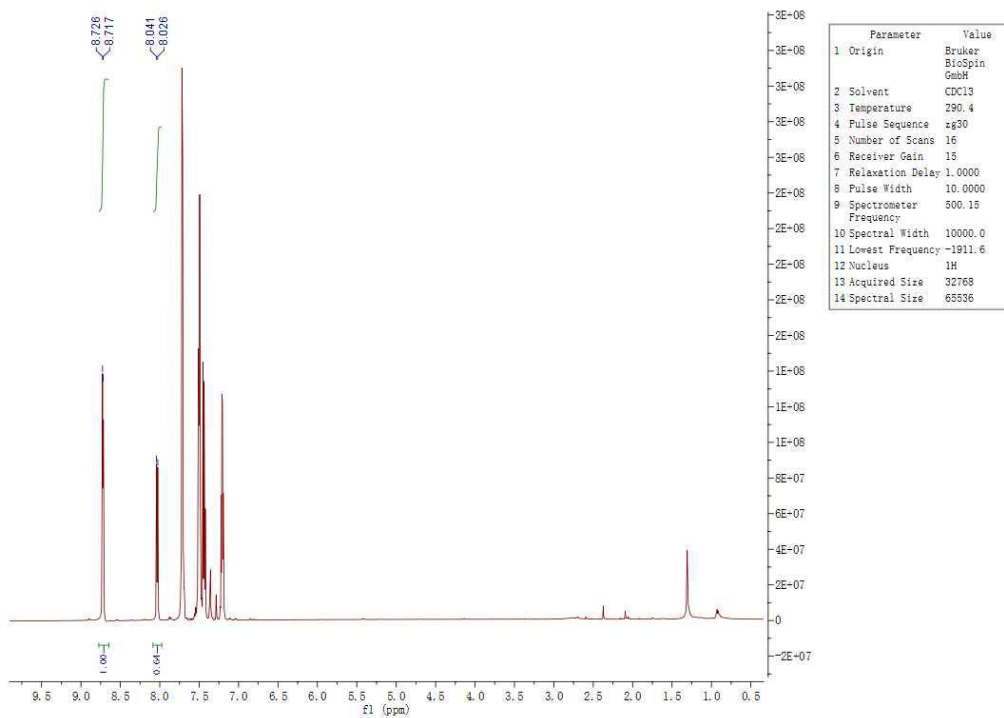

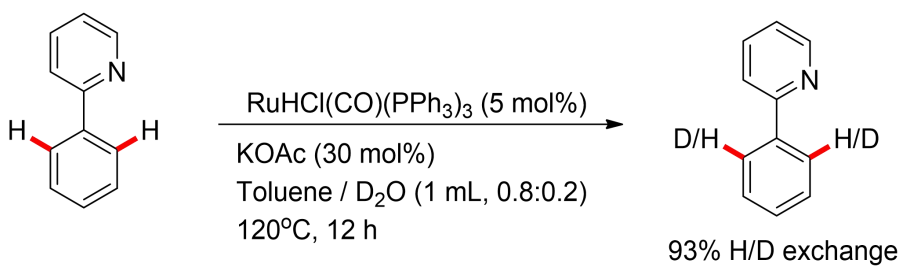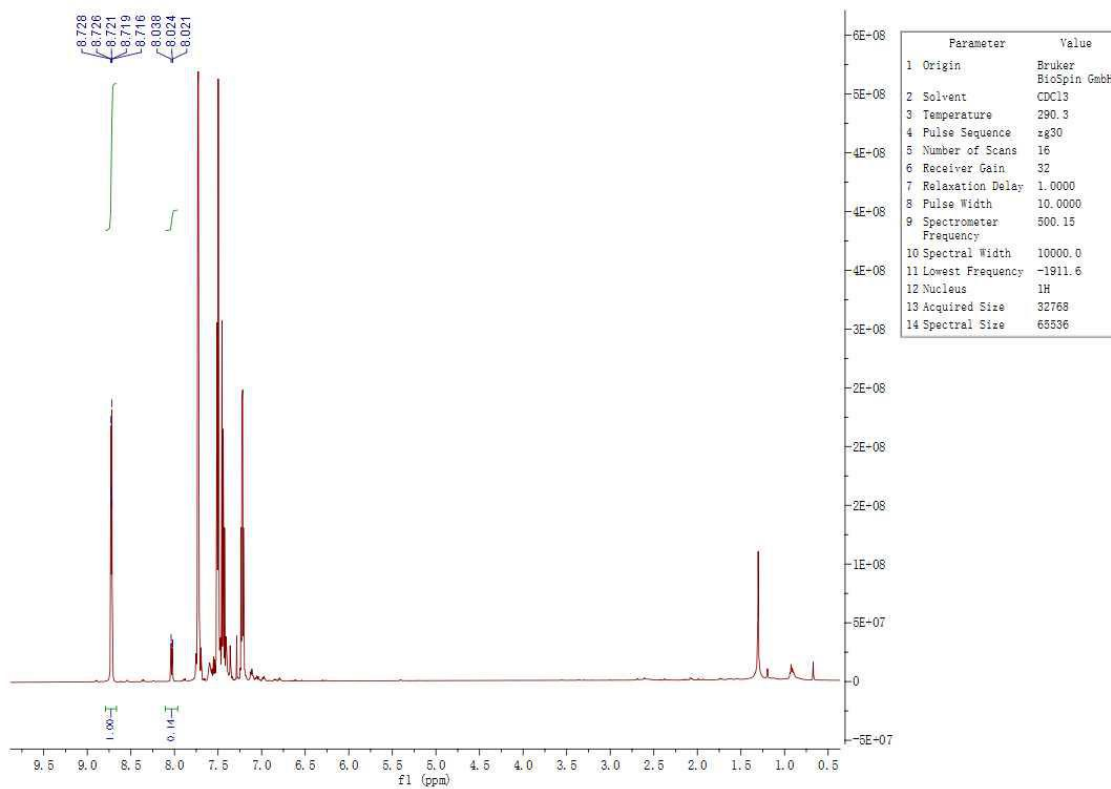

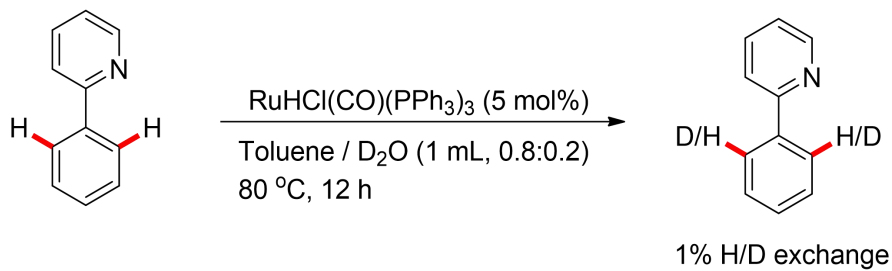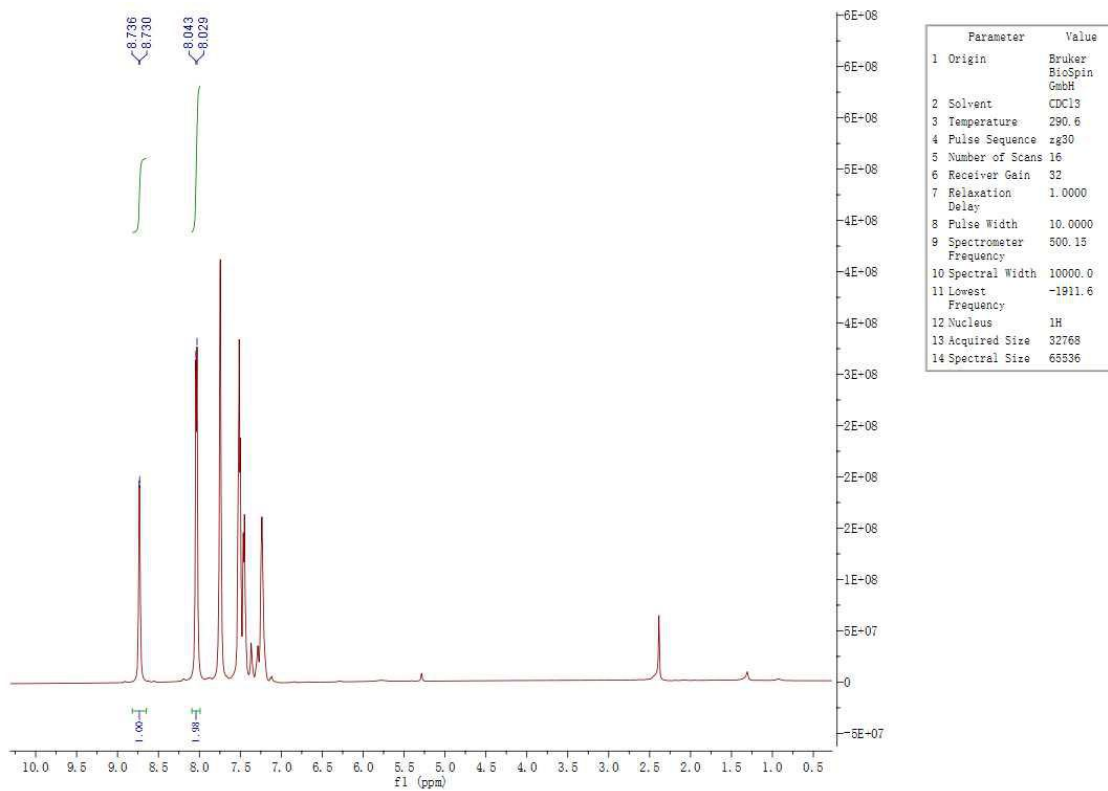

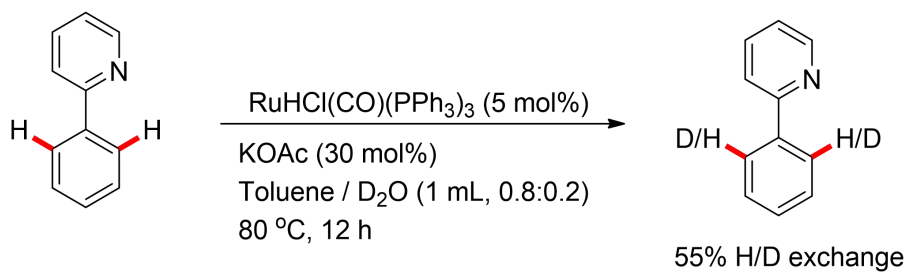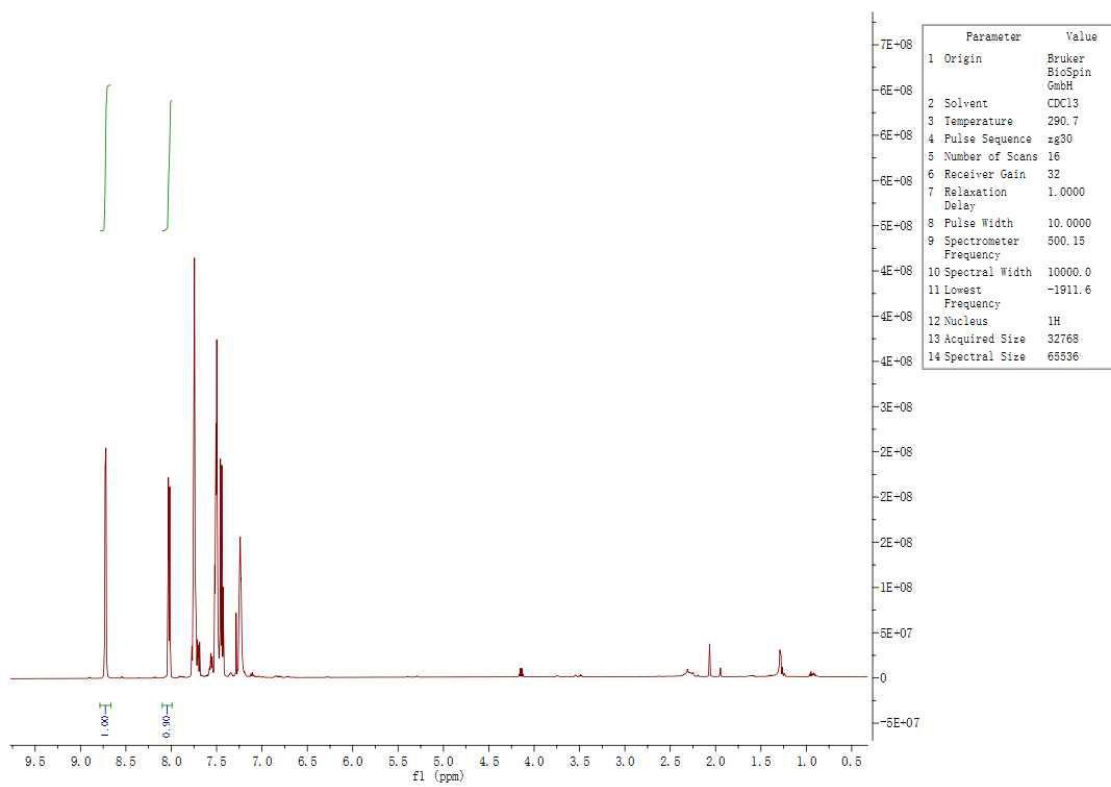

## Isotope Effect of Deuterium-Labeled Substrates.

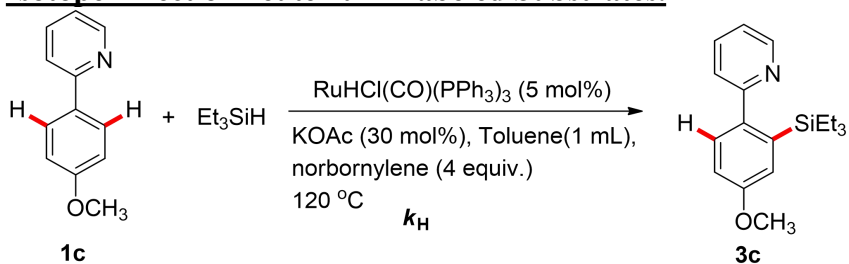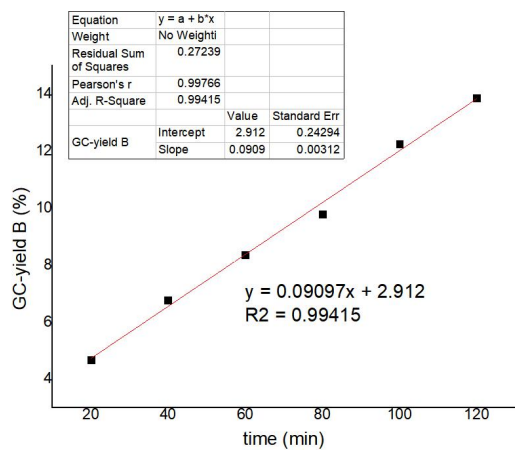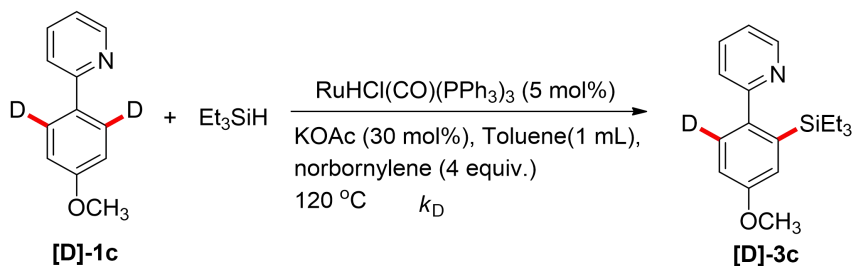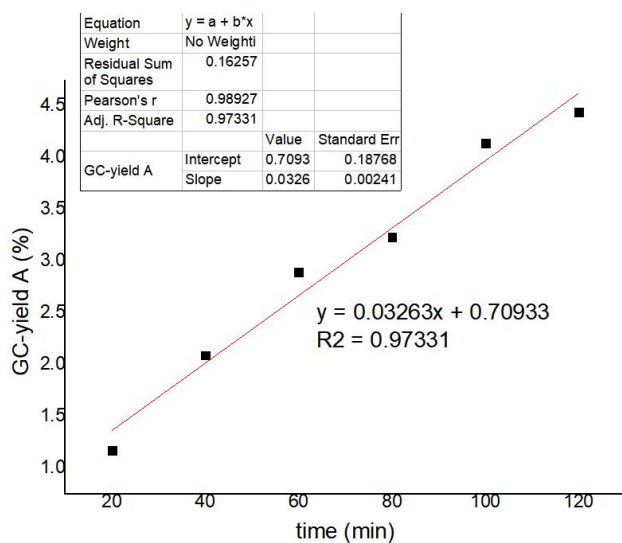

## Characterization data of substrates

### 2-(2-(triethylsilyl)phenyl)pyridine<sup>1</sup> (3a)

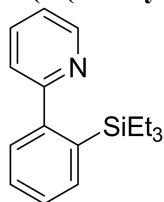

Light yellow oil, yield = 85%, 114 mg, <sup>1</sup>H NMR (300 MHz, CDCl<sub>3</sub>): δ = 8.69-8.67 (m, 1H), 7.78-7.69 (m, 2H), 7.50-7.41 (m, 4H), 7.31-7.27 (m, 1H), 0.88 (t, 9H, *J* = 8.1 Hz), 0.65-0.57 (m, 6H). <sup>13</sup>C{<sup>1</sup>H} NMR (75 MHz, CDCl<sub>3</sub>): δ = 162.0, 148.6, 148.0, 136.5, 136.2, 136.0, 129.2, 128.7, 127.3, 123.4, 122.1, 7.8, 4.6. HRMS (EI): *m/z* calcd for C<sub>17</sub>H<sub>24</sub>NSi [M+H]<sup>+</sup> 270.1678, found 270.1650.

### 2-(4-methyl-2-(triethylsilyl)phenyl)pyridine<sup>1</sup> (3b)

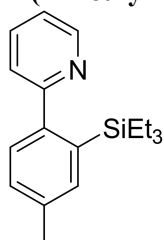

Light yellow oil, yield = 84%, 119 mg, <sup>1</sup>H NMR (300 MHz, CDCl<sub>3</sub>): δ = 8.67-8.66 (m, 1H), 7.76-7.71 (m, 1H), 7.49-7.46 (m, 2H), 7.40-7.37 (m, 1H), 7.29-7.24 (m, 2H), 2.46 (s, 3H), 0.89 (t, 9H, *J* = 8.1 Hz), 0.66-0.58 (m, 6H). <sup>13</sup>C{<sup>1</sup>H} NMR (75 MHz, CDCl<sub>3</sub>): δ = 162.0, 148.6, 145.2, 137.3, 136.6, 136.2, 135.9, 129.4, 129.1, 123.3, 121.9, 21.6, 7.9, 4.7. HRMS (EI): *m/z* calcd for C<sub>18</sub>H<sub>26</sub>NSi [M+H]<sup>+</sup> 284.1835, found 284.1805.

### 2-(4-methoxy-2-(triethylsilyl)phenyl)pyridine<sup>1</sup> (3c)

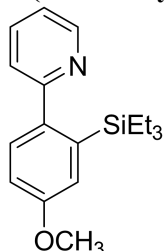

Brown oil, yield = 73%, 109 mg, <sup>1</sup>H NMR (300 MHz, CDCl<sub>3</sub>): δ = 8.64-8.62 (m, 1H), 7.75-7.69 (m, 1H), 7.47-7.41 (m, 2H), 7.26-7.22 (m, 2H), 6.98-6.95 (m, 1H), 3.88 (s, 3H), 0.87 (t, 9H, *J* = 8.1 Hz), 0.65-0.57 (m, 6H). <sup>13</sup>C{<sup>1</sup>H} NMR (75 MHz, CDCl<sub>3</sub>): δ = 161.5, 158.8, 148.5, 140.5, 138.0, 136.3, 130.4, 123.1, 122.9, 121.7, 113.0, 55.3, 7.87, 4.77. HRMS (EI): *m/z* calcd for C<sub>18</sub>H<sub>26</sub>NOSi [M+H]<sup>+</sup> 300.1784, found 300.1759.

### 2-(2-(triethylsilyl)-4-(trifluoromethyl)phenyl)pyridine<sup>1</sup> (3d)

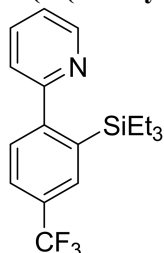

Light yellow oil, yield = 52%, 88 mg, <sup>1</sup>H NMR (300 MHz, CDCl<sub>3</sub>): δ = 8.69 (s, 1H), 7.89-7.28 (m, 6H), 0.85 (d, 9H, *J* = 8.1 Hz), 0.60-0.58 (m, 6H). <sup>13</sup>C{<sup>1</sup>H} NMR (75 MHz, CDCl<sub>3</sub>): δ =



160.6, 151.2, 148.8, 137.8, 136.7, 132.9, 129.4, 125.6, 123.4, 122.8, 7.7, 4.5.  $^{19}\text{F}$  NMR (470 MHz,  $\text{CDCl}_3$ ):  $\delta = -62.4$  ppm. HRMS (EI):  $m/z$  calcd for  $\text{C}_{18}\text{H}_{23}\text{F}_3\text{NSi}$   $[\text{M}+\text{H}]^+$  338.1552, found 338.1530.

### 3-methyl-2-(2-(triethylsilyl)phenyl)pyridine<sup>1</sup> (3e)

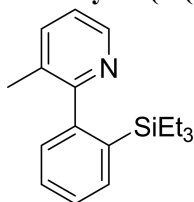

Light yellow oil, yield = 81%, 115 mg,  $^1\text{H}$  NMR (300 MHz,  $\text{CDCl}_3$ ):  $\delta = 8.50\text{-}8.48$  (m, 1H), 7.69-7.66 (m, 1H), 7.59-7.56 (m, 1H), 7.43-7.36 (m, 2H), 7.24-7.20 (m, 2H), 2.19 (s, 3H), 0.85 (t, 9H,  $J = 7.8$  Hz), 0.50-0.42 (m, 6H).  $^{13}\text{C}\{^1\text{H}\}$  NMR (75 MHz,  $\text{CDCl}_3$ ):  $\delta = 161.4, 147.3, 146.1, 137.8, 136.1, 135.9, 131.6, 128.9, 128.3, 126.8, 122.6, 19.9, 7.6, 3.7$ . HRMS (EI):  $m/z$  calcd for  $\text{C}_{18}\text{H}_{26}\text{NSi}$   $[\text{M}+\text{H}]^+$  284.1835, found 284.1805.

### 5-phenyl-2-(2-(triethylsilyl)phenyl)pyridine (3f)

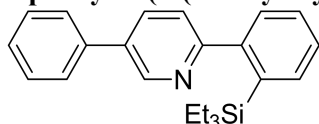

Light yellow solid, yield = 72%, 124 mg,  $^1\text{H}$  NMR (300 MHz,  $\text{CDCl}_3$ ):  $\delta = 8.95$  (s, 1H), 8.01-7.98 (m, 1H), 7.72-7.71 (m, 3H), 7.56-7.47 (m, 7H), 0.91 (t, 9H,  $J = 7.8$  Hz), 0.66-0.68 (m, 6H).  $^{13}\text{C}\{^1\text{H}\}$  NMR (75 MHz,  $\text{CDCl}_3$ ):  $\delta = 160.7, 147.5, 146.9, 137.9, 136.6, 136.2, 134.9, 134.7, 129.3, 129.2, 128.8, 128.2, 127.4, 127.2, 123.1, 7.9, 4.8$ . HRMS (EI):  $m/z$  calcd for  $\text{C}_{23}\text{H}_{28}\text{NSi}$   $[\text{M}+\text{H}]^+$  346.1991, found 346.1950.

### 2-(2-(triethylsilyl)phenyl)quinoline (3g)

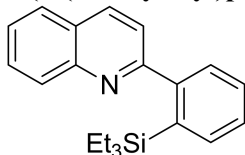

Light yellow solid, yield = 77%, 123 mg,  $^1\text{H}$  NMR (300 MHz,  $\text{CDCl}_3$ ):  $\delta = 8.26\text{-}8.18$  (m, 2H), 7.92-7.89 (m, 1H), 7.81-7.74 (m, 2H), 7.67-7.66 (m, 5H), 0.89-0.84 (m, 9H), 0.68-0.60 (m, 6H).  $^{13}\text{C}\{^1\text{H}\}$  NMR (75 MHz,  $\text{CDCl}_3$ ):  $\delta = 161.9, 148.3, 147.5, 136.7, 136.5, 129.9, 129.7, 129.6, 128.8, 127.8, 127.6, 127.5, 127.0, 126.5, 121.9, 7.8, 4.7$ . HRMS (EI):  $m/z$  calcd for  $\text{C}_{21}\text{H}_{26}\text{NSi}$   $[\text{M}+\text{H}]^+$  320.1835, found 320.1799.

### 4-chloro-2-(2-(triethylsilyl)phenyl)quinoline (3h)

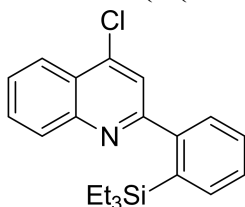

Brown oil, yield = 75%, 133 mg,  $^1\text{H}$  NMR (300 MHz,  $\text{CDCl}_3$ ):  $\delta = 8.34\text{-}8.31$  (m, 1H), 8.23-8.20 (m, 1H), 7.86-7.66 (m, 4H), 7.59-7.46 (m, 3H), 0.91-0.86 (m, 9H), 0.71-0.63 (m, 6H).  $^{13}\text{C}\{^1\text{H}\}$  NMR (75 MHz,  $\text{CDCl}_3$ ):  $\delta = 161.7, 148.4, 147.1, 142.7, 136.8, 136.6, 130.8, 129.9, 129.5, 128.9, 127.9, 127.4, 125.2, 124.2, 121.8, 7.8, 4.9$ . HRMS (EI):  $m/z$  calcd for  $\text{C}_{21}\text{H}_{25}\text{ClNSi}$   $[\text{M}+\text{H}]^+$  354.1445, found 354.1409.

### 1-(2-(triethylsilyl)phenyl)isoquinoline (3i)

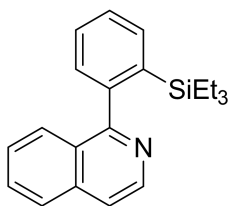

Light yellow solid, yield = 81%, 129 mg,  $^1\text{H}$  NMR (300 MHz,  $\text{CDCl}_3$ ):  $\delta$  = 8.61 (d, 1H,  $J$  = 2.7 Hz), 7.90-7.66 (m, 5H), 7.51-7.39 (m, 4H), 0.77 (t, 9H,  $J$  = 7.8 Hz), 0.39-0.31 (m, 6H).  $^{13}\text{C}\{^1\text{H}\}$  NMR (75 MHz,  $\text{CDCl}_3$ ):  $\delta$  = 163.1, 146.0, 141.7, 137.0, 136.4, 136.2, 130.1, 129.9, 128.1, 128.0, 127.2, 126.9, 126.8, 120.2, 7.5, 3.8. HRMS (EI):  $m/z$  calcd for  $\text{C}_{21}\text{H}_{26}\text{NSi}$  [ $\text{M}+\text{H}$ ] $^+$  320.1835, found 320.1798.

### 2-(3-(triethylsilyl)thiophen-2-yl)pyridine<sup>2</sup> (3j)

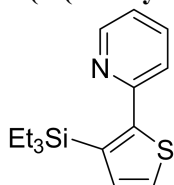

Brown oil, yield = 74%, 102 mg,  $^1\text{H}$  NMR (300 MHz,  $\text{CDCl}_3$ ):  $\delta$  = 8.64-8.62 (m, 1H), 7.71-7.58 (m, 2H), 7.41 (d, 1H,  $J$  = 5.1 Hz), 7.25-7.17 (m, 2H), 0.96-0.84 (m, 15H).  $^{13}\text{C}\{^1\text{H}\}$  NMR (75 MHz,  $\text{CDCl}_3$ ):  $\delta$  = 154.3, 150.2, 148.8, 137.0, 136.3, 135.7, 125.5, 122.2, 122.0, 7.9, 4.9. HRMS (EI):  $m/z$  calcd for  $\text{C}_{15}\text{H}_{22}\text{NSSi}$  [ $\text{M}+\text{H}$ ] $^+$  276.1242, found 276.1240.

### 1-(2-(triethylsilyl)phenyl)-1H-pyrazole<sup>1</sup> (3k)

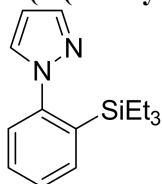

Brown oil, yield = 57%, 74 mg,  $^1\text{H}$  NMR (300 MHz,  $\text{CDCl}_3$ ):  $\delta$  = 7.70-7.62 (m, 3H), 7.46-7.43 (m, 2H), 7.30-7.28 (m, 1H), 6.45 (t, 1H,  $J$  = 2.0 Hz), 0.89 (t, 9H,  $J$  = 7.6 Hz), 0.61-0.55 (m, 6H).  $^{13}\text{C}\{^1\text{H}\}$  NMR (75 MHz,  $\text{CDCl}_3$ ):  $\delta$  = 146.6, 140.0, 136.8, 133.9, 130.5, 129.7, 126.3, 106.7, 7.7, 3.6. HRMS (EI):  $m/z$  calcd for  $\text{C}_{15}\text{H}_{23}\text{N}_2\text{Si}$  [ $\text{M}+\text{H}$ ] $^+$  259.1631, found 259.1626.

### 4-methyl-2-(2-(triethylsilyl)phenyl)thiazole (3l)

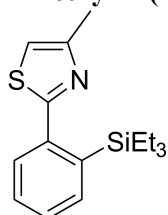

Colorless oil, yield = 43%, 62 mg,  $^1\text{H}$  NMR (300 MHz,  $\text{CDCl}_3$ ):  $\delta$  = 7.68-7.57 (m, 2H), 7.43-7.40 (m, 2H), 6.93 (d, 1H,  $J$  = 0.9 Hz), 2.52 (s, 3H), 0.89 (t, 9H,  $J$  = 8.1 Hz), 0.78-0.72 (m, 6H).  $^{13}\text{C}\{^1\text{H}\}$  NMR (75 MHz,  $\text{CDCl}_3$ ):  $\delta$  = 169.2, 153.0, 140.7, 136.8, 129.9, 128.8, 128.4, 114.5, 17.2, 7.9, 4.6. HRMS (EI):  $m/z$  calcd for  $\text{C}_{16}\text{H}_{24}\text{NSSi}$  [ $\text{M}+\text{H}$ ] $^+$  290.1399, found 290.1394.

### 3-methyl-1-(2-(triethylsilyl)phenyl)-1H-pyrazole (3m)

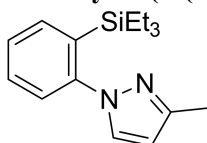

Brown oil, yield = 70%, 95 mg,  $^1\text{H}$  NMR (300 MHz,  $\text{CDCl}_3$ ):  $\delta$  = 7.65-7.62 (m, 1H), 7.52-7.27 (m, 4H), 6.22 (d, 1H,  $J$  = 2.1 Hz), 2.39 (s, 3H), 0.91 (t, 9H,  $J$  = 8.1 Hz), 0.67-0.59 (m, 6H).

$^{13}\text{C}\{^1\text{H}\}$  NMR (75 MHz,  $\text{CDCl}_3$ ):  $\delta = 149.1, 146.6, 136.8, 133.5, 130.8, 129.6, 127.3, 125.6, 106.4, 13.6, 7.7, 3.7$ . HRMS (EI):  $m/z$  calcd for  $\text{C}_{16}\text{H}_{25}\text{N}_2\text{Si}$   $[\text{M}+\text{H}]^+$  273.1787, found 273.1787.

### 2-(2-(triethylsilyl)phenyl)-4,5-dihydrooxazole<sup>3</sup> (3n)

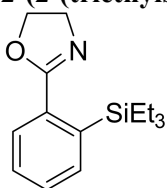

Light yellow oil, yield = 65%, 85 mg,  $^1\text{H}$  NMR (300 MHz,  $\text{CDCl}_3$ ):  $\delta = 7.84\text{-}7.80$  (m, 1H), 7.62-7.59 (m, 1H), 7.45-7.37 (m, 2H), 4.41 (t, 2H,  $J = 9.6$  Hz), 4.06 (t, 2H,  $J = 9.6$  Hz), 1.00-0.84 (m, 15H).  $^{13}\text{C}\{^1\text{H}\}$  NMR (75 MHz,  $\text{CDCl}_3$ ):  $\delta = 166.6, 137.1, 136.1, 134.4, 129.5, 129.4, 128.5, 67.5, 55.0, 7.7, 4.2$ . HRMS (EI):  $m/z$  calcd for  $\text{C}_{15}\text{H}_{24}\text{NOSi}$   $[\text{M}+\text{H}]^+$  262.1627, found 262.1614.

### 4,4-dimethyl-2-(2-(triethylsilyl)phenyl)-4,5-dihydrooxazole<sup>4</sup> (3o)

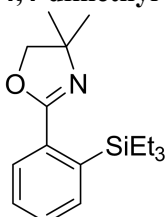

Light yellow oil, yield = 53%, 77 mg,  $^1\text{H}$  NMR (500 MHz,  $\text{CDCl}_3$ ):  $\delta = 7.86\text{-}7.85$  (m, 1H), 7.60-7.58 (m, 1H), 7.44-7.38 (m, 2H), 4.12 (s, 2H), 1.41 (s, 6H), 0.96-0.85 (m, 15H).  $^{13}\text{C}\{^1\text{H}\}$  NMR (125.8 MHz,  $\text{CDCl}_3$ ):  $\delta = 164.3, 137.0, 136.3, 134.7, 130.0, 129.7, 128.7, 79.3, 67.9, 28.7, 8.0, 4.5$ . HRMS (EI):  $m/z$  calcd for  $\text{C}_{17}\text{H}_{28}\text{NOSi}$   $[\text{M}+\text{H}]^+$  290.1940, found 290.1912.

### 2-(5-methyl-2-(triethylsilyl)phenyl)-4,5-dihydrooxazole<sup>3</sup> (3p)

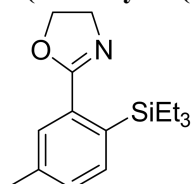

Colorless oil, yield = 45%, 62 mg,  $^1\text{H}$  NMR (500 MHz,  $\text{CDCl}_3$ )  $\delta = 7.67$  (s, 1H), 7.49 (d, 1H,  $J = 8.0$  Hz), 7.28-7.25 (m, 1H), 4.43 (t, 2H,  $J = 9.5$  Hz), 4.07 (t, 2H,  $J = 9.5$  Hz), 2.38 (s, 3H), 0.95-0.82 (m, 15H).  $^{13}\text{C}$  NMR (125.8 MHz,  $\text{CDCl}_3$ )  $\delta = 166.9, 138.6, 136.4, 134.4, 133.5, 130.6, 130.4, 67.6, 55.2, 21.2, 7.9, 4.4$ . HRMS (EI):  $m/z$  calcd for  $\text{C}_{16}\text{H}_{26}\text{NOSi}$   $[\text{M}+\text{H}]^+$  276.1784, found 276.1782.

### methyl 4-(4,5-dihydrooxazol-2-yl)-3-(triethylsilyl)benzoate<sup>3</sup> (3q)

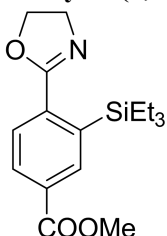

Brown oil, yield = 60%, 96 mg,  $^1\text{H}$  NMR (500 MHz,  $\text{CDCl}_3$ )  $\delta = 8.26$  (d, 1H,  $J = 1.5$  Hz), 8.05-8.03 (m, 1H), 7.87 (d, 1H,  $J = 8.0$  Hz), 4.45 (t, 2H,  $J = 9.5$  Hz), 4.09 (t, 2H,  $J = 9.5$  Hz), 3.94 (s, 3H), 0.95-0.87 (m, 15H).  $^{13}\text{C}$  NMR (125.8 MHz,  $\text{CDCl}_3$ )  $\delta = 167.1, 165.8, 138.7, 138.0, 137.3, 130.7, 129.8, 129.6, 67.8, 55.3, 52.4, 7.8, 4.3$ . HRMS (EI):  $m/z$  calcd for  $\text{C}_{17}\text{H}_{26}\text{NO}_3\text{Si}$   $[\text{M}+\text{H}]^+$  320.1682, found 320.1679.

**Mixture of 2-(4-(methylthio)phenyl)-6-(((triethylsilyl)oxy)methyl)pyridine (4a) and 2-(4-(methylthio)-2-(triethylsilyl)phenyl)-6-(((triethylsilyl)oxy)methyl)pyridine (5a) (65:35)**

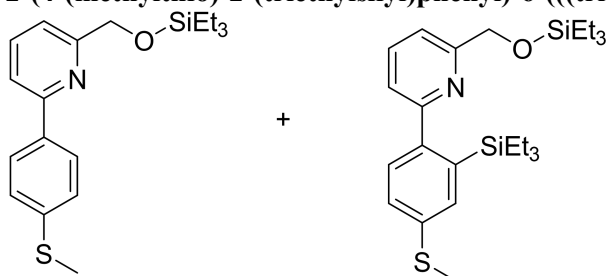

Yellow oil, yield = 75%, 127 mg, with ratio of mono : di = 65:35.  $^1\text{H}$  NMR (300 MHz,  $\text{CDCl}_3$ ):  $\delta$  = 7.99-7.93 (m, 1.34H), 7.79-7.72 (m, 1.19H), 7.57-7.48 (m, 2.02H), 7.37-7.28 (m, 2.31H), 4.94 (s, 1.02H), 4.92 (s, 0.48H), 2.54 (s, 0.88H), 2.53 (s, 1.97H), 1.04 (t, 7.67H,  $J$  = 8.1 Hz), 0.86 (t, 2.64H,  $J$  = 7.8 Hz), 0.77-0.69 (m, 5.12H), 0.60-0.57 (m, 1.78H). HRMS (EI):  $m/z$  calcd for  $\text{C}_{19}\text{H}_{27}\text{NOSSiNa}$   $[\text{M}+\text{Na}]^+$  366.1682, found 366.1681. HRMS (EI):  $m/z$  calcd for  $\text{C}_{25}\text{H}_{41}\text{NOSSi}_2\text{Na}$   $[\text{M}+\text{Na}]^+$  480.2547, found 480.2552.

**Mixture of 1-(4-(((triethylsilyl)oxy)methyl)phenyl)-1H-pyrazole (4b) and 1-(2-(triethylsilyl)-4-(((triethylsilyl)oxy)methyl)phenyl)-1H-pyrazole (5b) (30:70)**

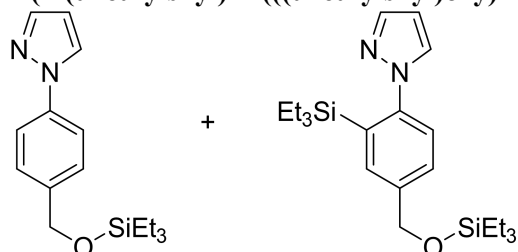

Brown oil, yield = 72%, 133 mg, with ratio of mono : di = 30:70.  $^1\text{H}$  NMR (300 MHz,  $\text{CDCl}_3$ ):  $\delta$  = 7.68-7.55 (m, 4H), 7.43-7.38 (m, 1.35H), 7.26-7.21 (m, 1.40H), 6.44-6.42 (m, 1.29H), 4.83 (s, 2H), 4.70 (s, 0.77H), 1.02 (t, 9H,  $J$  = 8.1 Hz), 0.88 (t, 13.2H,  $J$  = 7.8 Hz), 0.74-0.66 (m, 6H), 0.61-0.53 (m, 8.37H). HRMS (EI):  $m/z$  calcd for  $\text{C}_{16}\text{H}_{25}\text{N}_2\text{OSi}$   $[\text{M}+\text{H}]^+$  289.1730, found 289.1742. HRMS (EI):  $m/z$  calcd for  $\text{C}_{22}\text{H}_{39}\text{N}_2\text{OSi}_2$   $[\text{M}+\text{H}]^+$  403.2595, found 403.2602.

**2-(4-(((triethylsilyl)oxy)phenyl)pyridine (4c)**

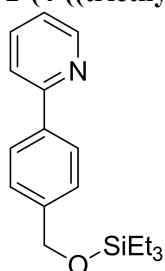

Colorless oil, yield = 88%, 132 mg,  $^1\text{H}$  NMR (300 MHz,  $\text{CDCl}_3$ ):  $\delta$  = 8.70 (d, 1H,  $J$  = 4.8 Hz), 8.00 (d, 2H,  $J$  = 8.4 Hz), 7.73 (d, 2H,  $J$  = 3.3 Hz), 7.47 (d, 2H,  $J$  = 8.4 Hz), 7.24-7.19 (m, 1H), 4.83 (s, 2H), 1.02 (t, 9H,  $J$  = 7.8 Hz), 0.74-0.66 (m, 6H).  $^{13}\text{C}\{^1\text{H}\}$  NMR (75 MHz,  $\text{CDCl}_3$ ):  $\delta$  = 157.4, 149.7, 142.4, 138.2, 136.8, 126.9, 126.6, 122.0, 120.5, 64.6, 6.9, 4.6. HRMS (EI):  $m/z$  calcd for  $\text{C}_{18}\text{H}_{26}\text{NOSi}$   $[\text{M}+\text{H}]^+$  300.1784, found 300.1751.

**2-(2-(triethylsilyl)-4-(((triethylsilyl)oxy)phenyl)pyridine (5c)**

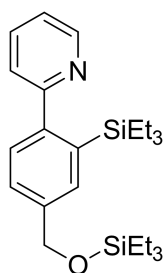

Brown oil, yield = 68%, 140 mg,  $^1\text{H}$  NMR (300 MHz,  $\text{CDCl}_3$ ):  $\delta$  = 8.66 (d, 1H,  $J$  = 4.2 Hz), 7.75-7.68 (m, 2H), 7.48-7.44 (m, 3H), 7.28-7.24 (m, 1H), 4.86 (s, 2H), 1.05 (t, 9H,  $J$  = 8.1 Hz), 0.88 (t, 9H,  $J$  = 7.8 Hz), 0.76-0.57 (m, 12H).  $^{13}\text{C}\{^1\text{H}\}$  NMR (75 MHz,  $\text{CDCl}_3$ ):  $\delta$  = 161.9, 148.6, 146.8, 139.9, 136.2, 135.9, 134.4, 129.1, 126.7, 123.4, 122.0, 64.9, 7.8, 6.9, 4.7, 4.6. HRMS (EI):  $m/z$  calcd for  $\text{C}_{24}\text{H}_{40}\text{NOSi}_2$  [ $\text{M}+\text{H}$ ] $^+$  414.2648, found 414.2649.

### 8-((triethylsilyl)methyl)quinoline<sup>5</sup> (6)

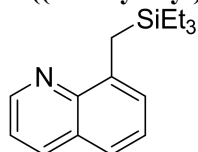

Colorless oil, yield = 81%, 104 mg,  $^1\text{H}$  NMR (300 MHz,  $\text{CDCl}_3$ ):  $\delta$  = 8.93-8.91 (m, 1H), 8.12-8.09 (m, 1H), 7.58-7.35 (m, 4H), 2.90 (s, 2H), 0.92 (t, 9H,  $J$  = 7.8 Hz), 0.57-0.49 (m, 6H).  $^{13}\text{C}\{^1\text{H}\}$  NMR (75 MHz,  $\text{CDCl}_3$ ):  $\delta$  = 148.7, 146.8, 141.0, 136.2, 128.6, 128.0, 126.3, 123.9, 120.8, 17.1, 7.5, 3.7. HRMS (EI):  $m/z$  calcd for  $\text{C}_{16}\text{H}_{24}\text{NSi}$  [ $\text{M}+\text{H}$ ] $^+$  258.1678, found 258.1652.

## References

- [1] Choi, G.; Tsurugi, H.; Mashima, K. *J. Am. Chem. Soc.*, **2013**, *135*, 13149.
- [2] Rubio-Pérez, L.; Iglesias, M.; Munárriz, J.; Polo, V.; Passarelli, V.; Pérez-Torrente, J. J.; Oro, L. A. *Chem. Sci.*, **2017**, *8*, 4811.
- [3] Liu, S.; Zhang, S.; Lin, Q.; Huang, Y.; Li, B. *Org. Lett.* **2019**, *21*, 1134.
- [4] Kakiuchi, F.; Matsumoto, M.; Tsuchiya, K.; Igi, K.; Hayamizu, T.; Chatani, N.; Murai, S. *J. Organom. Chem.*, **2003**, *686*, 134.
- [5] Mita, T.; Michigami, K.; Sato, Y. *Org. Lett.*, **2012**, *14*, 3462.

## 2-(2-(triethylsilyl)phenyl)pyridine (3a)

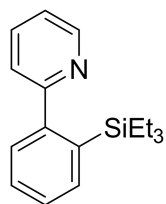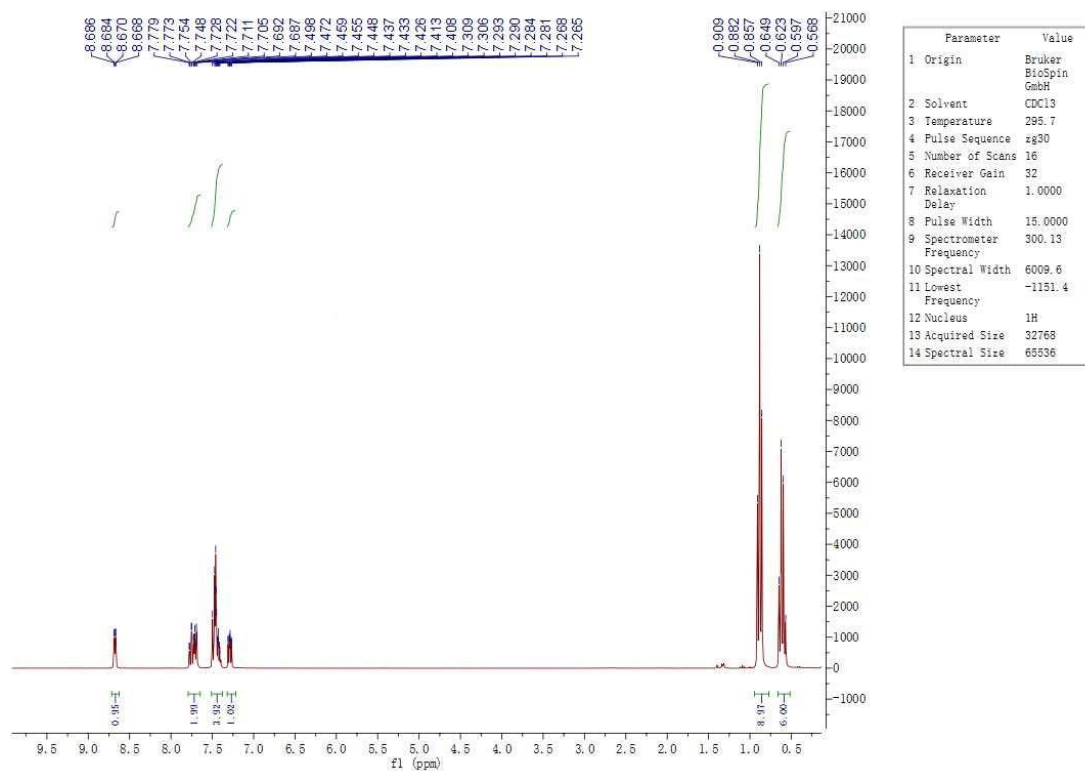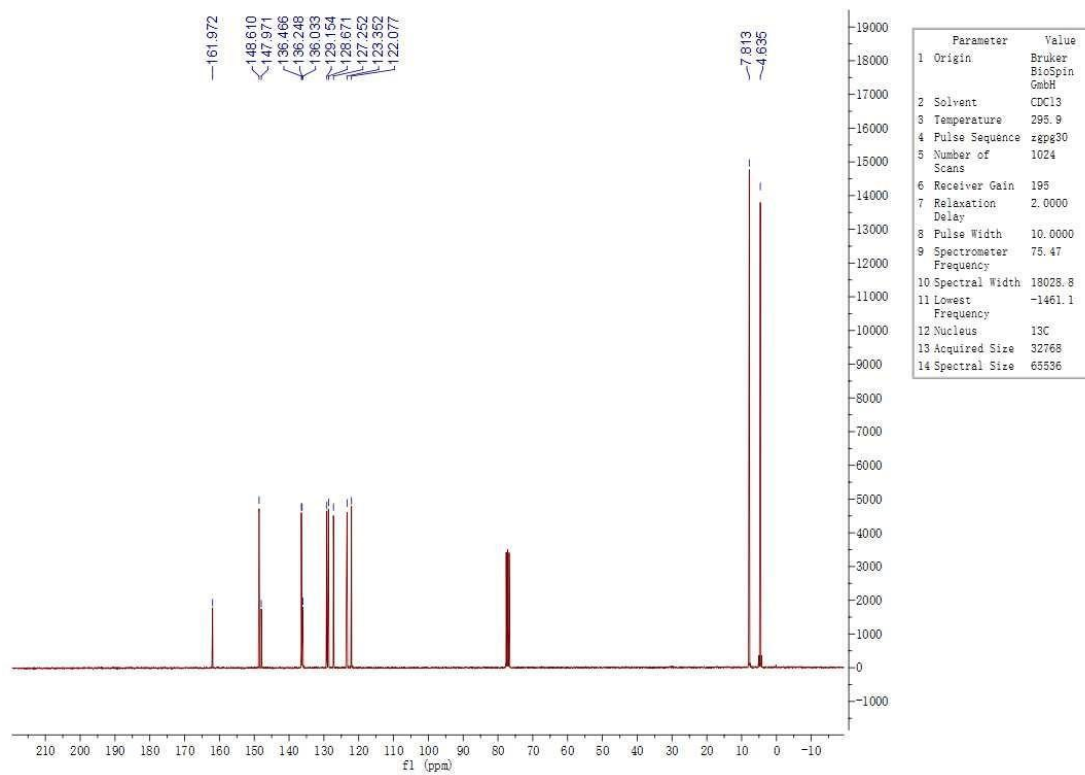

## 2-(4-methyl-2-(triethylsilyl)phenyl)pyridine (3b)

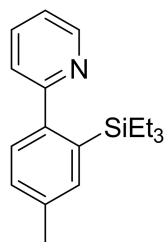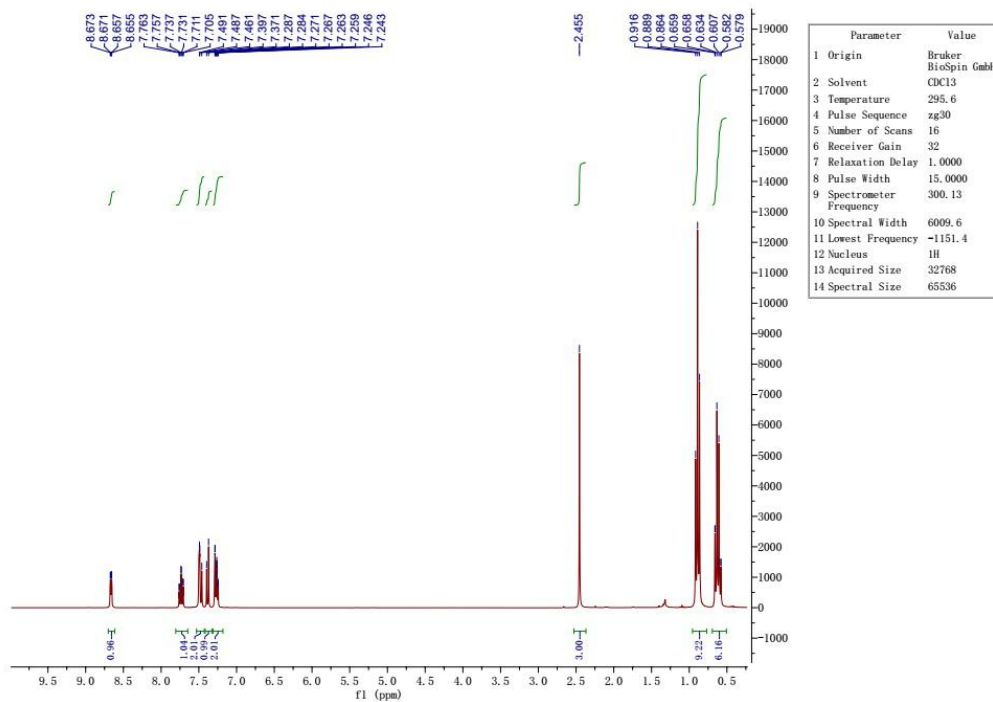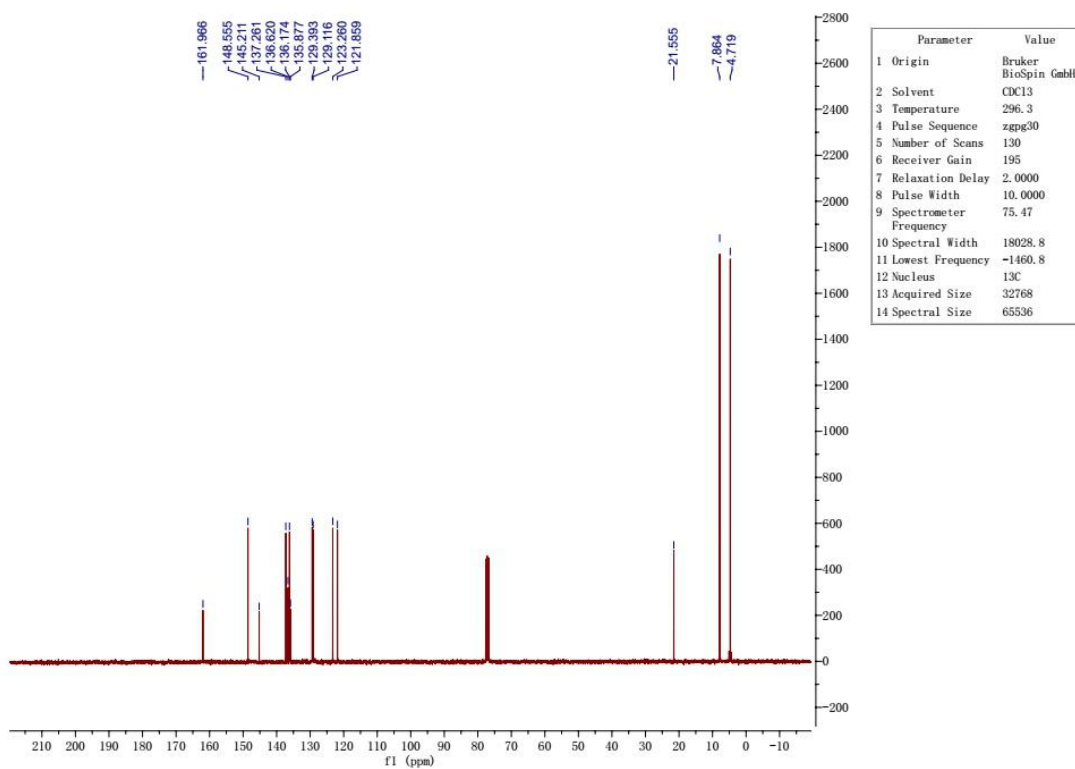

## 2-(4-methoxy-2-(triethylsilyl)phenyl)pyridine (3c)

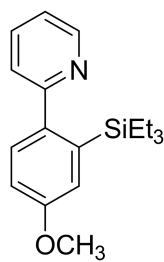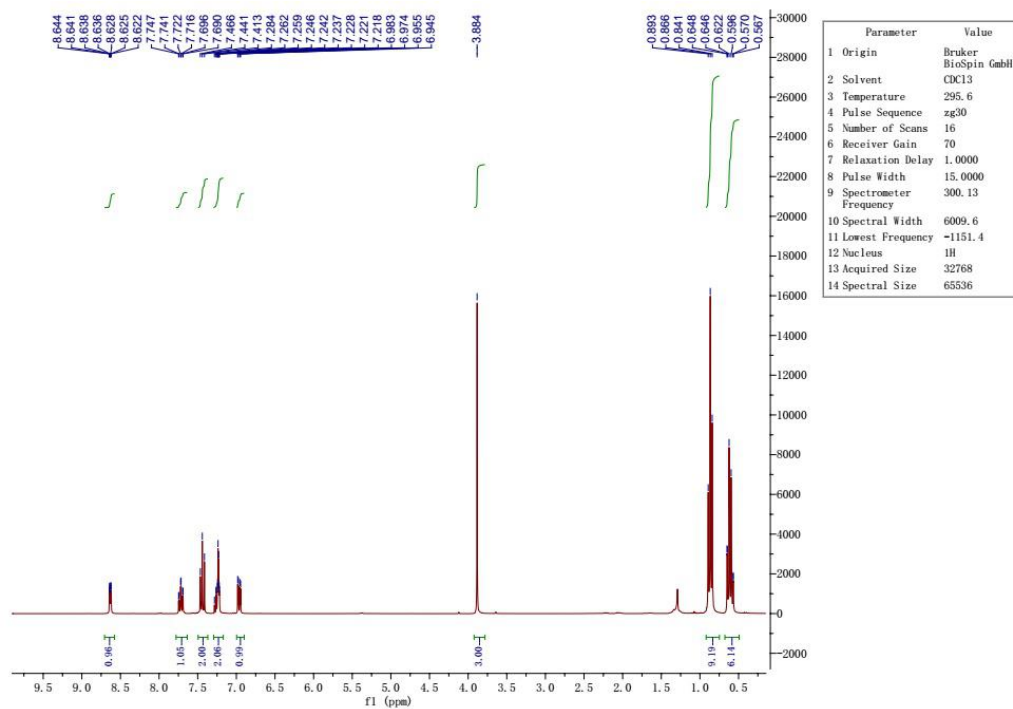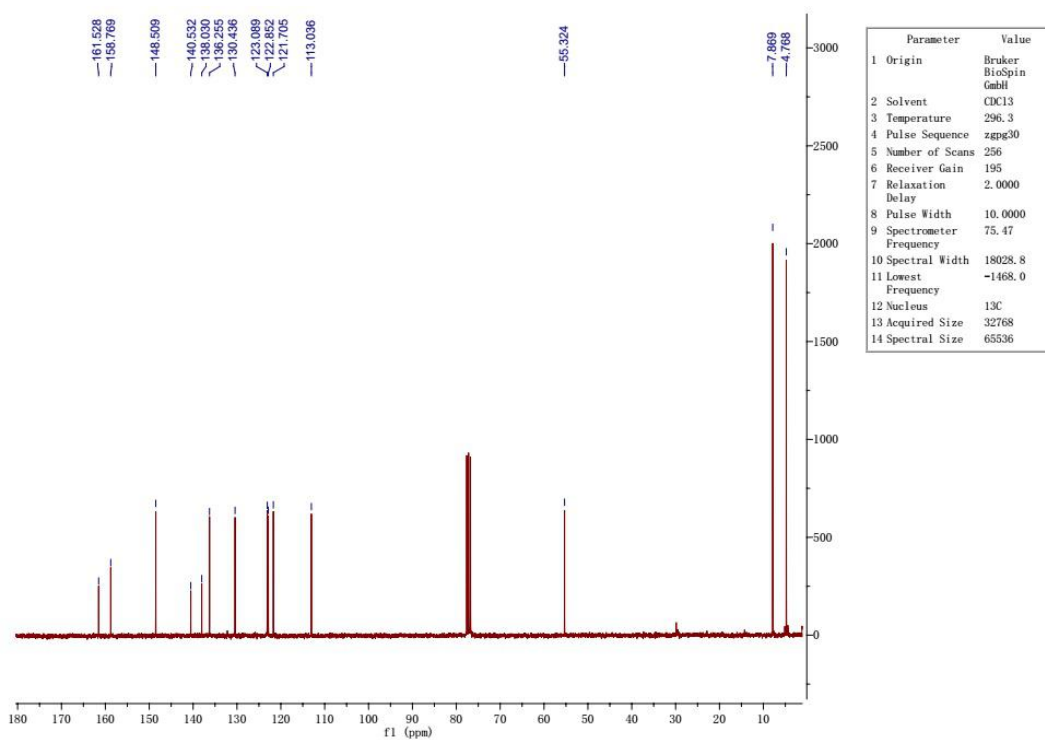



## 2-(2-(triethylsilyl)-4-(trifluoromethyl)phenyl)pyridine (3d)

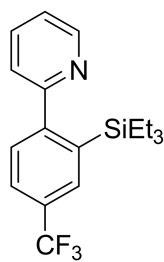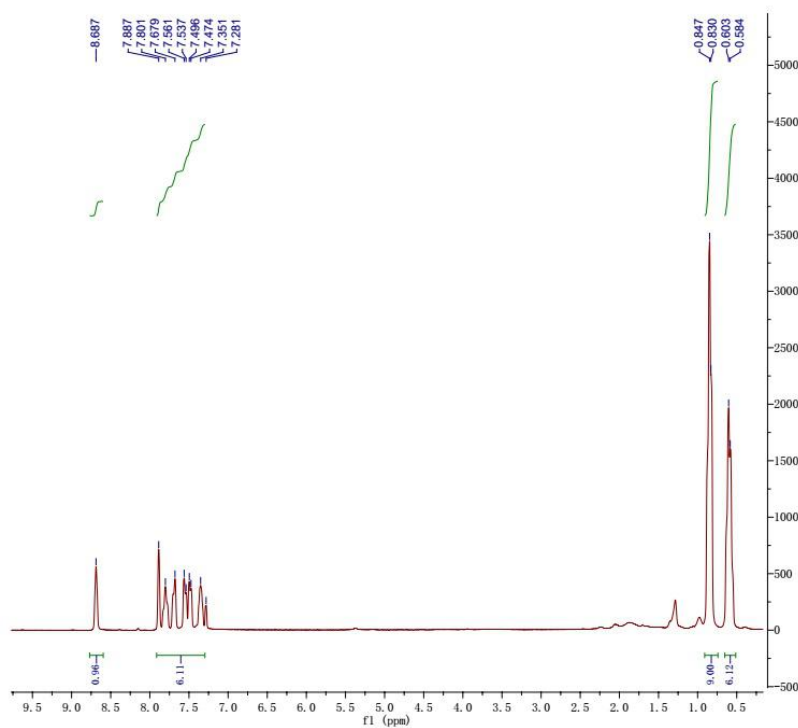

| Parameter                | Value               |
|--------------------------|---------------------|
| 1 Origin                 | Bruker BioSpin GmbH |
| 2 Solvent                | CDCl3               |
| 3 Temperature            | 296.9               |
| 4 Pulse Sequence         | zg30                |
| 5 Number of Scans        | 16                  |
| 6 Receiver Gain          | 163                 |
| 7 Relaxation Delay       | 1.0000              |
| 8 Pulse Width            | 15.0000             |
| 9 Spectrometer Frequency | 300.13              |
| 10 Spectral Width        | 6009.6              |
| 11 Lowest Frequency      | -1151.4             |
| 12 Nucleus               | 1H                  |
| 13 Acquired Size         | 32768               |
| 14 Spectral Size         | 65536               |

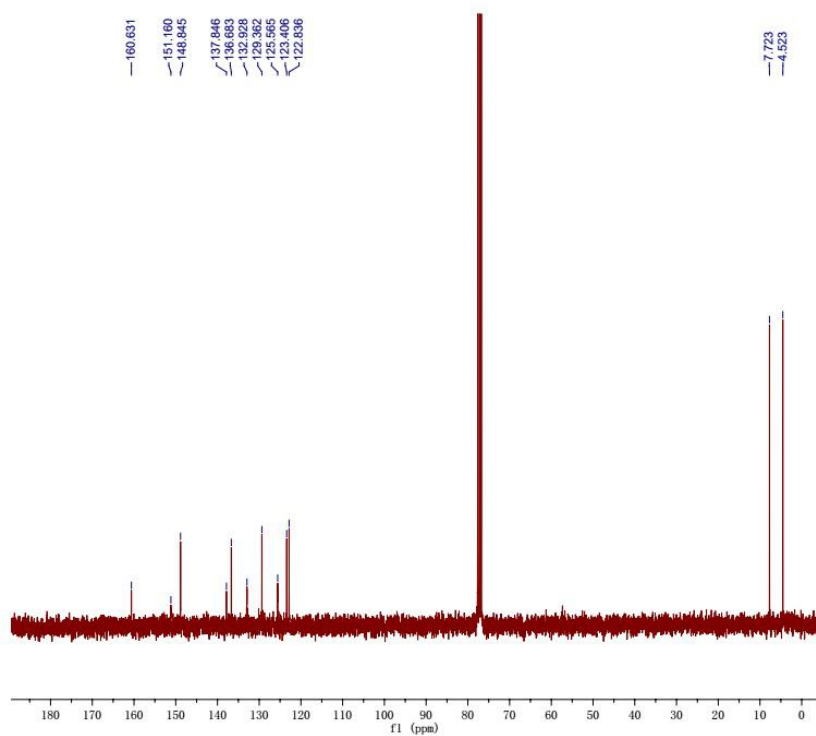

| Parameter                | Value               |
|--------------------------|---------------------|
| 1 Origin                 | Bruker BioSpin GmbH |
| 2 Solvent                | CDCl3               |
| 3 Temperature            | 296.9               |
| 4 Pulse Sequence         | zgpg30              |
| 5 Number of Scans        | 256                 |
| 6 Receiver Gain          | 195                 |
| 7 Relaxation Delay       | 2.0000              |
| 8 Pulse Width            | 10.0000             |
| 9 Spectrometer Frequency | 75.47               |
| 10 Spectral Width        | 18028.8             |
| 11 Lowest Frequency      | -1468.0             |
| 12 Nucleus               | 13C                 |
| 13 Acquired Size         | 32768               |
| 14 Spectral Size         | 65536               |

### 3-methyl-2-(2-(triethylsilyl)phenyl)pyridine (3e)

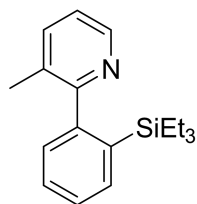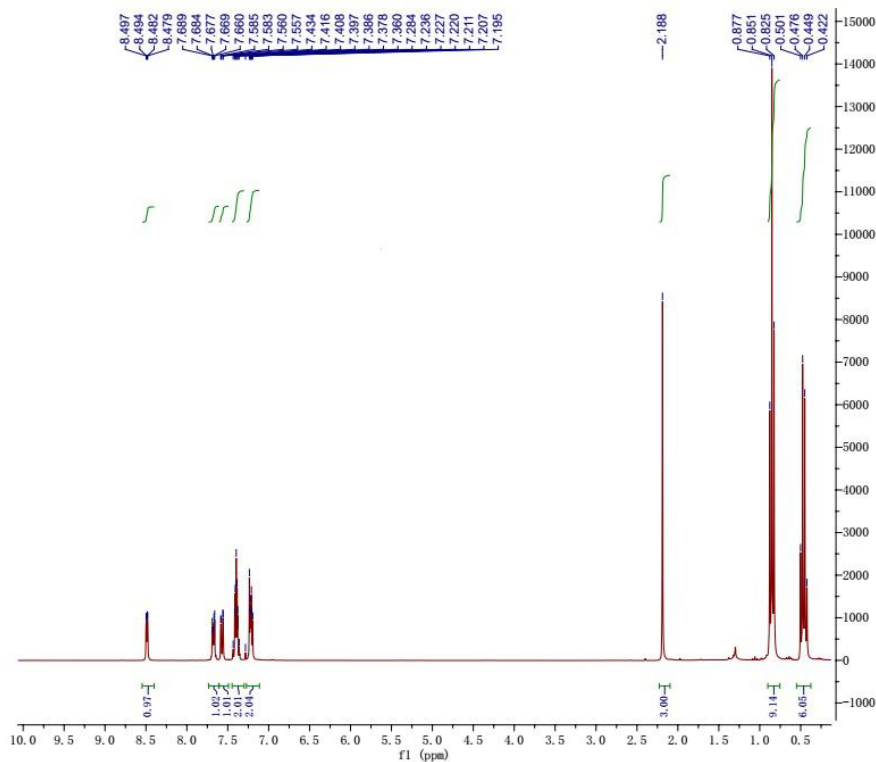

| Parameter                | Value               |
|--------------------------|---------------------|
| 1 Origin                 | Bruker BioSpin GmbH |
| 2 Solvent                | CDCl3               |
| 3 Temperature            | 295.5               |
| 4 Pulse Sequence         | zg30                |
| 5 Number of Scans        | 16                  |
| 6 Receiver Gain          | 32                  |
| 7 Relaxation Delay       | 1.0000              |
| 8 Pulse Width            | 15.0000             |
| 9 Spectrometer Frequency | 300.13              |
| 10 Spectral Width        | 6009.6              |
| 11 Lowest Frequency      | -1151.4             |
| 12 Nucleus               | <sup>1</sup> H      |
| 13 Acquired Size         | 32768               |
| 14 Spectral Size         | 65536               |

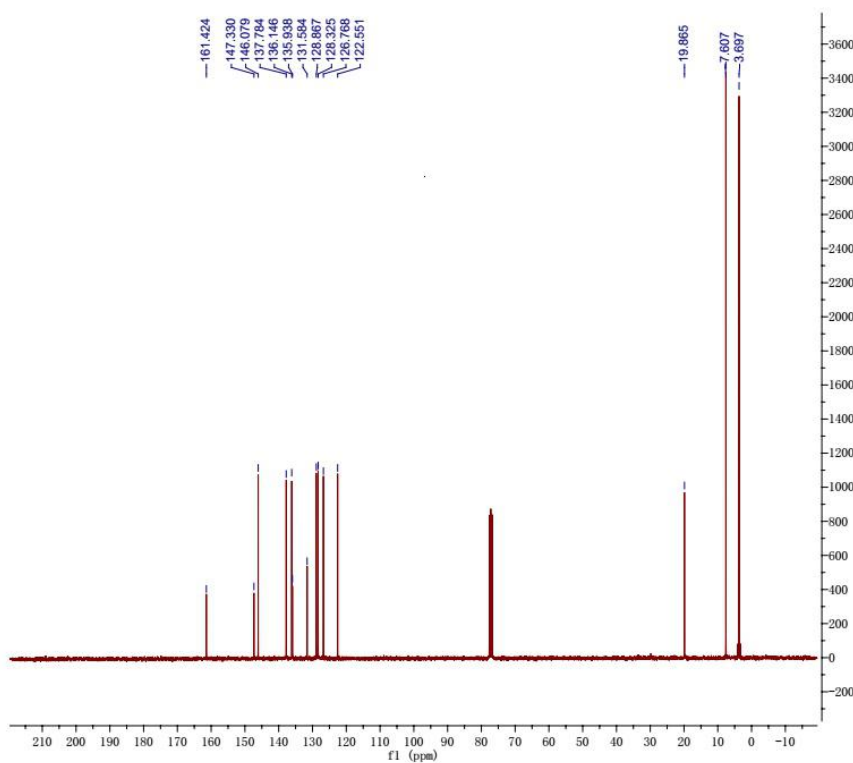

| Parameter                | Value               |
|--------------------------|---------------------|
| 1 Origin                 | Bruker BioSpin GmbH |
| 2 Solvent                | CDCl3               |
| 3 Temperature            | 296.3               |
| 4 Pulse Sequence         | zgpg30              |
| 5 Number of Scans        | 246                 |
| 6 Receiver Gain          | 195                 |
| 7 Relaxation Delay       | 2.0000              |
| 8 Pulse Width            | 10.0000             |
| 9 Spectrometer Frequency | 75.47               |
| 10 Spectral Width        | 18028.8             |
| 11 Lowest Frequency      | -1460.8             |
| 12 Nucleus               | <sup>13</sup> C     |
| 13 Acquired Size         | 32768               |
| 14 Spectral Size         | 65536               |

### 5-phenyl-2-(2-(triethylsilyl)phenyl)pyridine (3f)

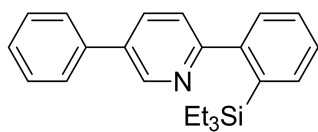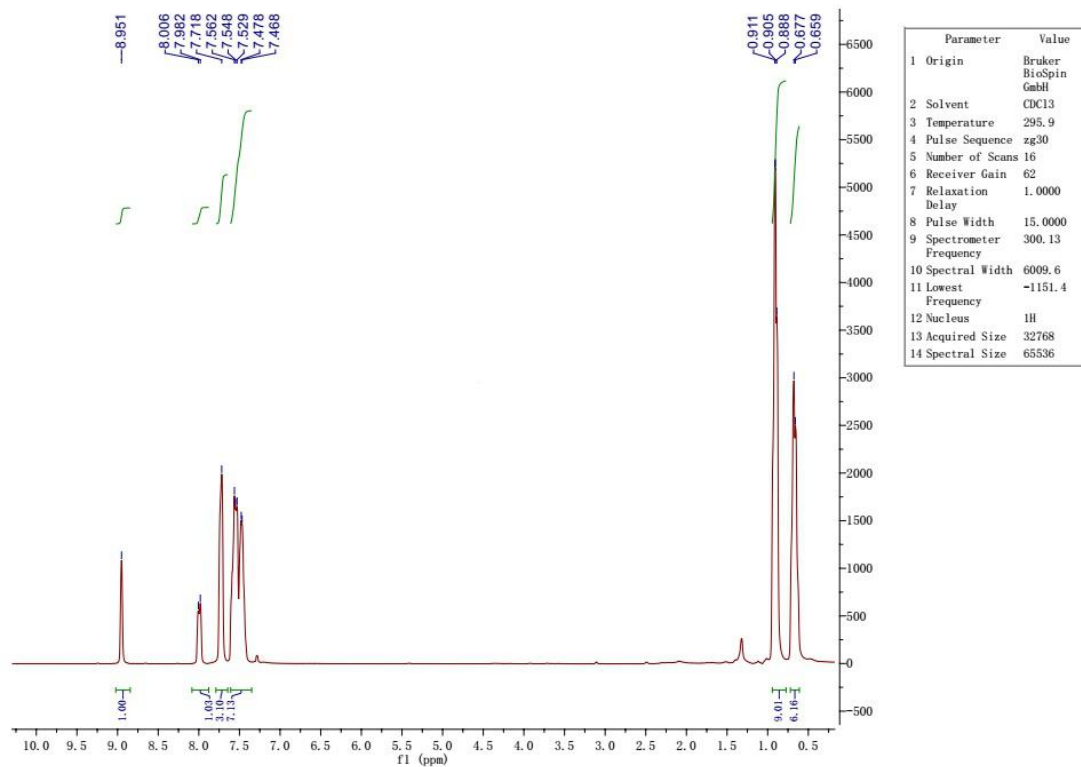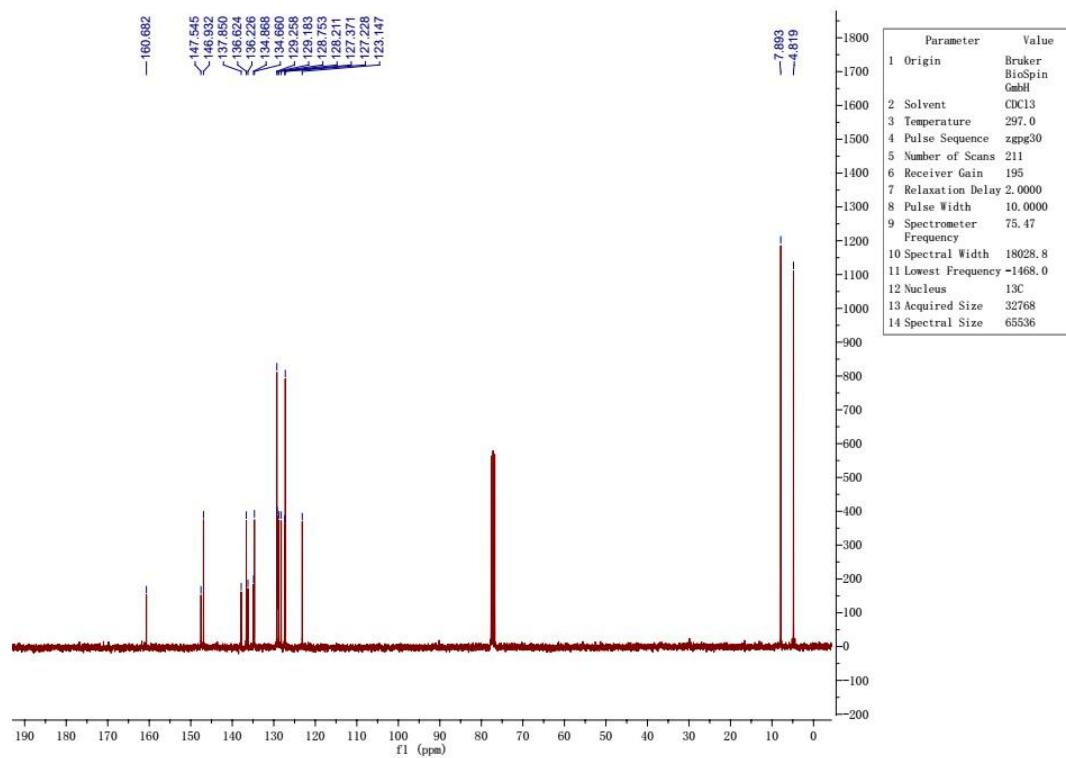

## 2-(2-(triethylsilyl)phenyl)quinoline (3g)

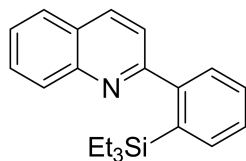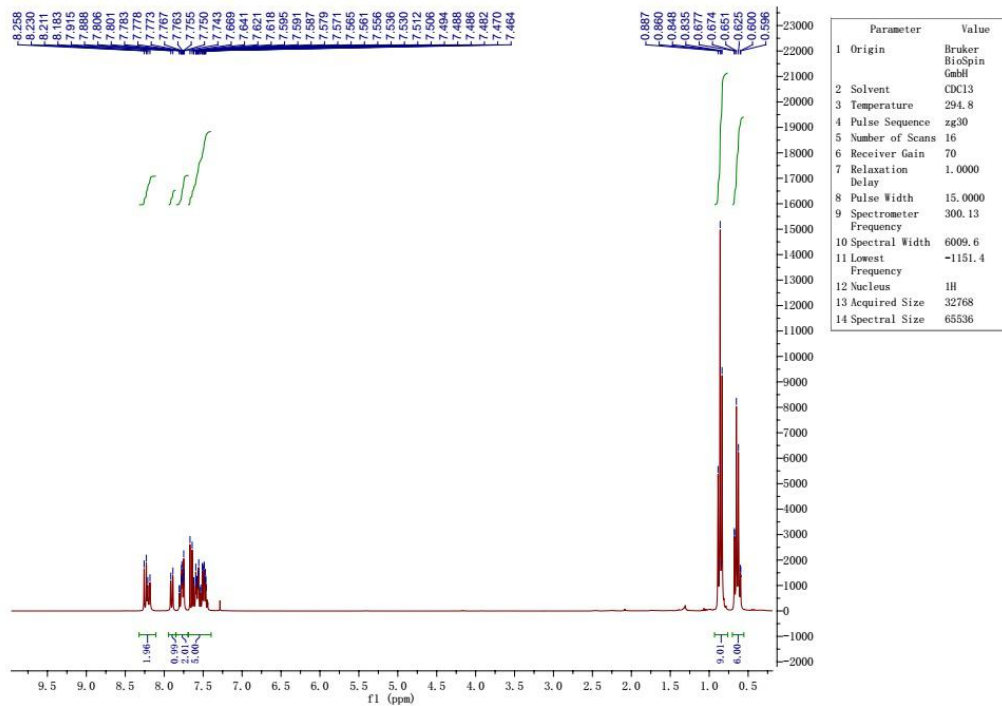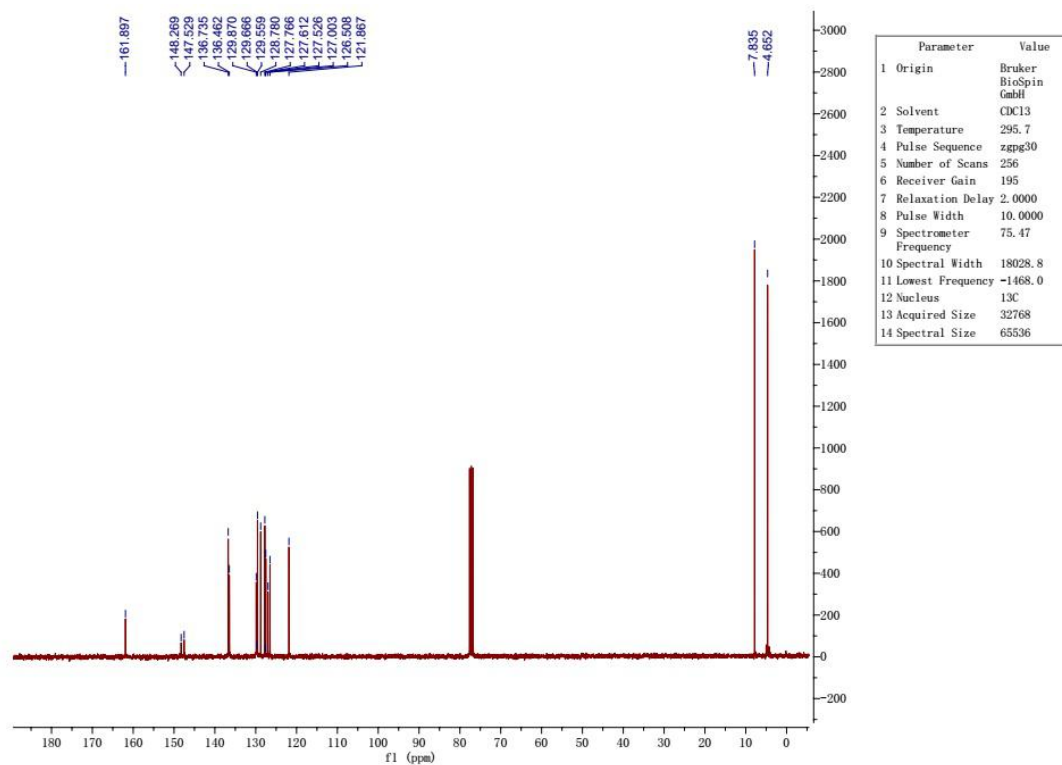

### 4-chloro-2-(2-(triethylsilyl)phenyl)quinoline (3h)

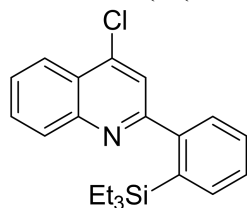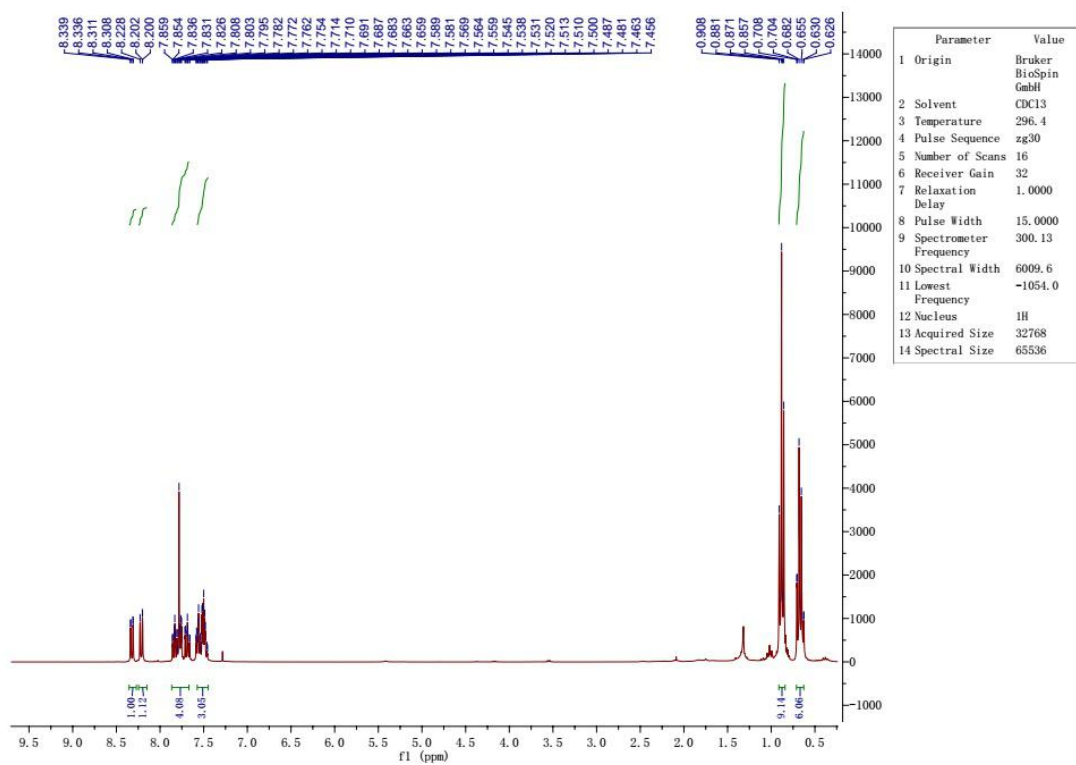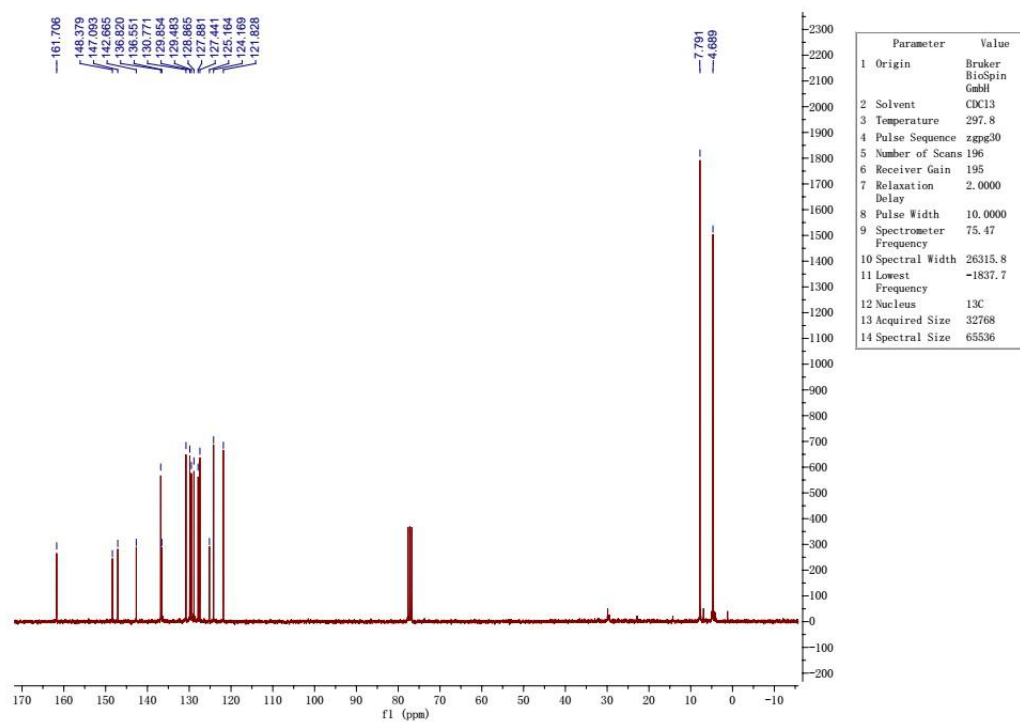

# 1-(2-(triethylsilyl)phenyl)isoquinoline (3i)

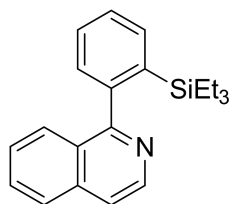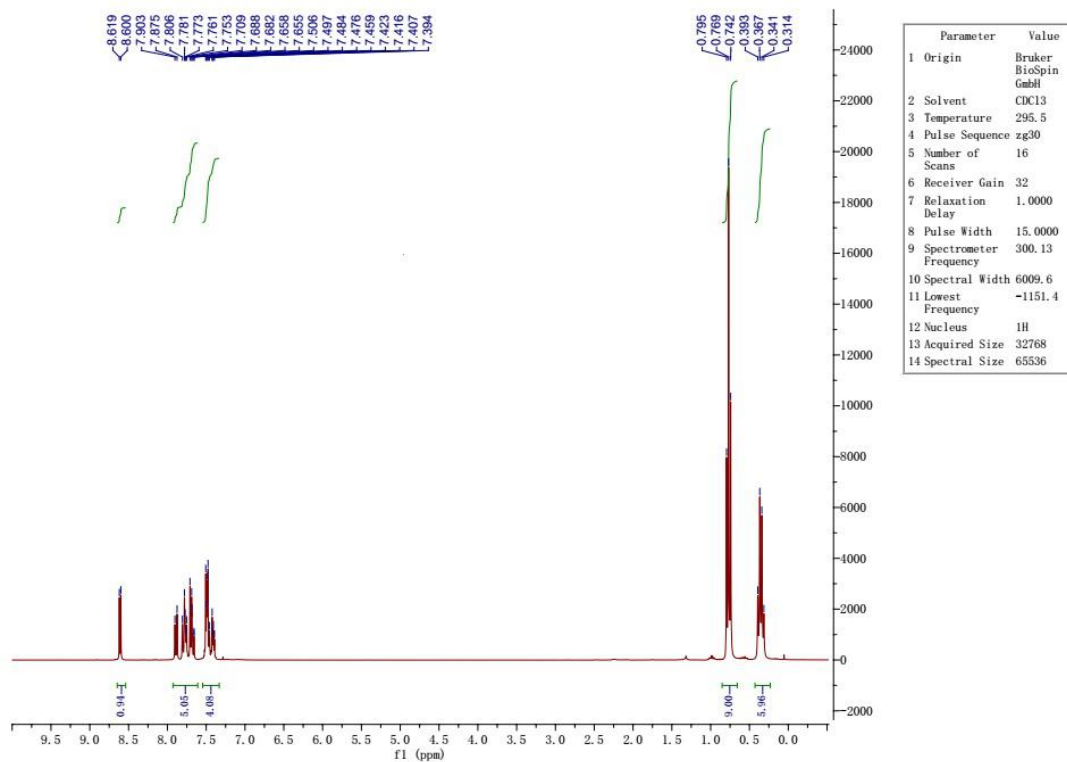

| Parameter                | Value               |
|--------------------------|---------------------|
| 1 Origin                 | Bruker BioSpin GmbH |
| 2 Solvent                | CDCl3               |
| 3 Temperature            | 295.5               |
| 4 Pulse Sequence         | zg30                |
| 5 Number of Scans        | 16                  |
| 6 Receiver Gain          | 32                  |
| 7 Relaxation Delay       | 1.0000              |
| 8 Pulse Width            | 15.0000             |
| 9 Spectrometer Frequency | 300.13              |
| 10 Spectral Width        | 6009.6              |
| 11 Lowest Frequency      | -1151.4             |
| 12 Nucleus               | 1H                  |
| 13 Acquired Size         | 32768               |
| 14 Spectral Size         | 65536               |

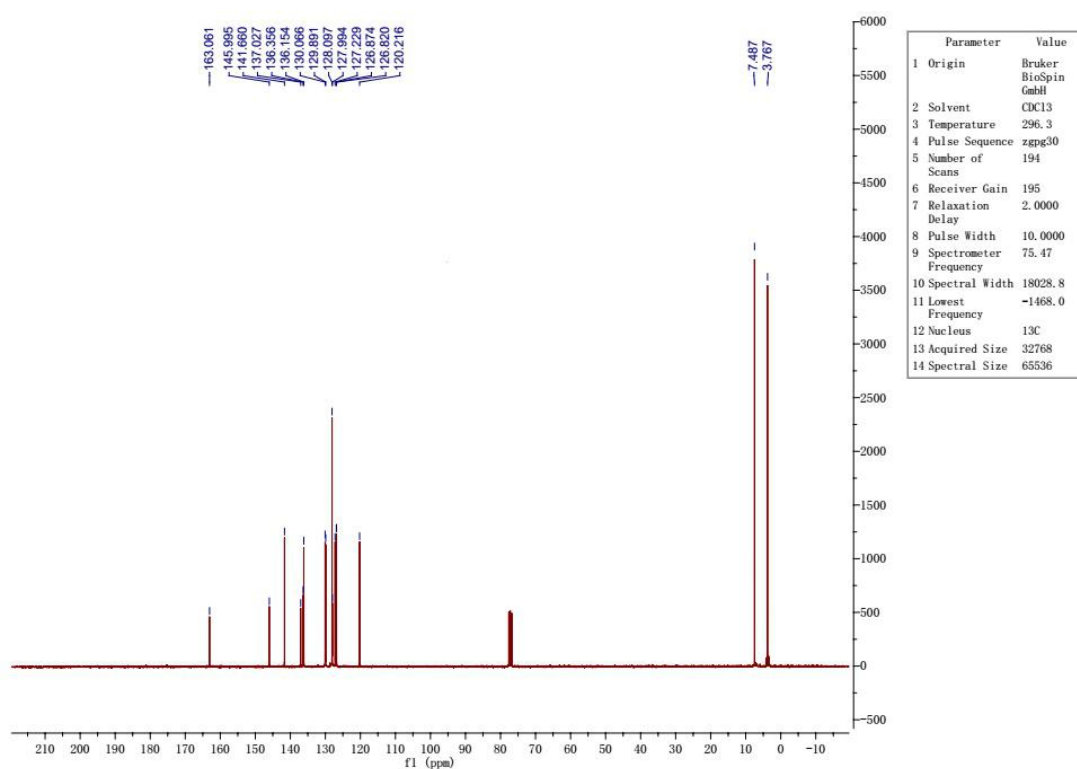

| Parameter                | Value               |
|--------------------------|---------------------|
| 1 Origin                 | Bruker BioSpin GmbH |
| 2 Solvent                | CDCl3               |
| 3 Temperature            | 296.3               |
| 4 Pulse Sequence         | zgpg30              |
| 5 Number of Scans        | 194                 |
| 6 Receiver Gain          | 195                 |
| 7 Relaxation Delay       | 2.0000              |
| 8 Pulse Width            | 10.0000             |
| 9 Spectrometer Frequency | 75.47               |
| 10 Spectral Width        | 18028.8             |
| 11 Lowest Frequency      | -1468.0             |
| 12 Nucleus               | 13C                 |
| 13 Acquired Size         | 32768               |
| 14 Spectral Size         | 65536               |

## 2-(3-(triethylsilyl)thiophen-2-yl)pyridine (3j)

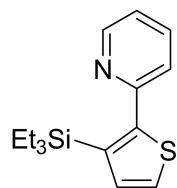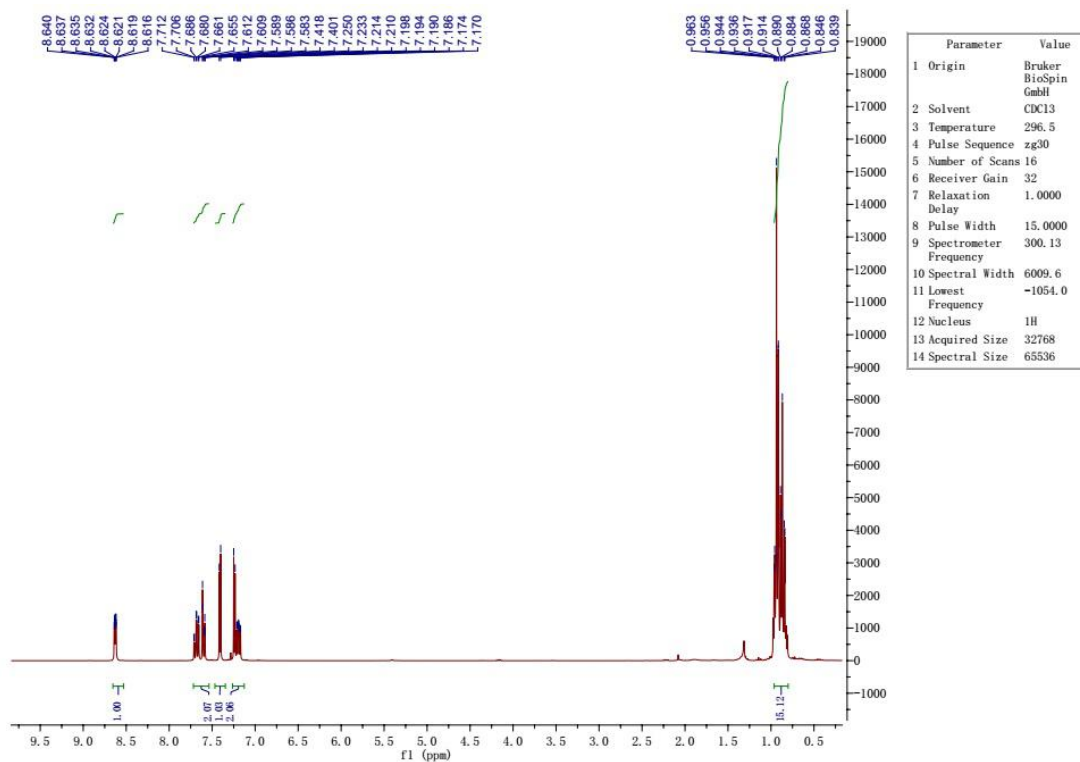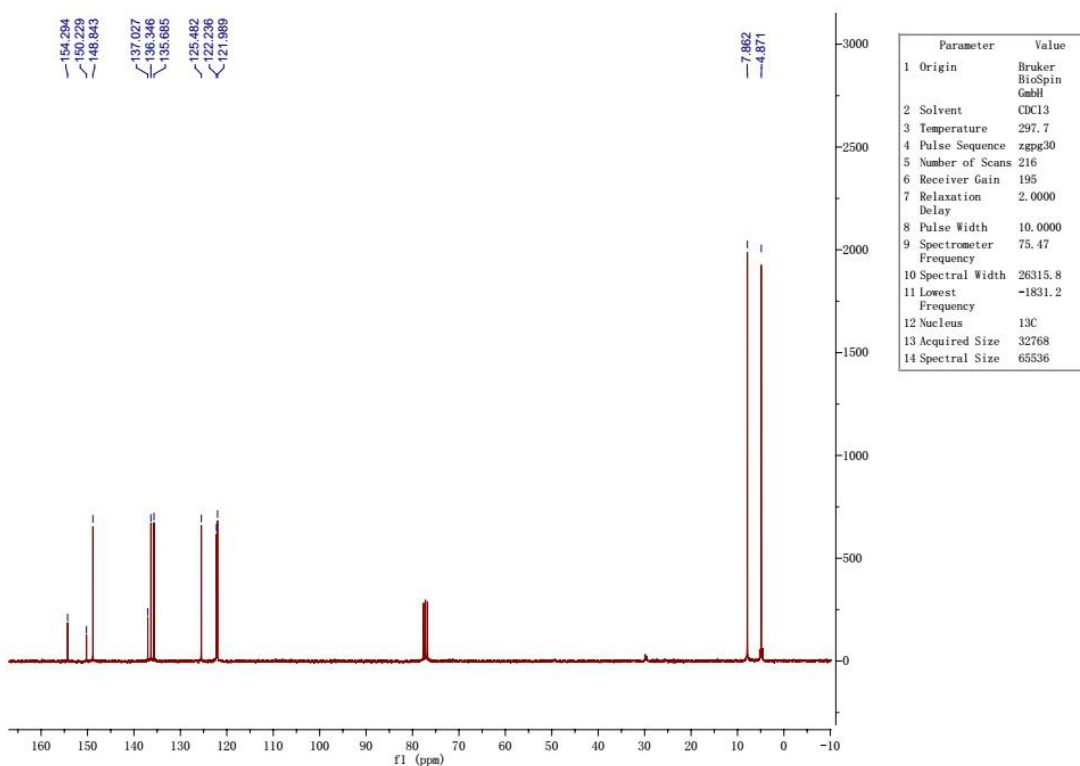

# 1-(2-(triethylsilyl)phenyl)-1H-pyrazole (3k)

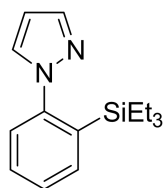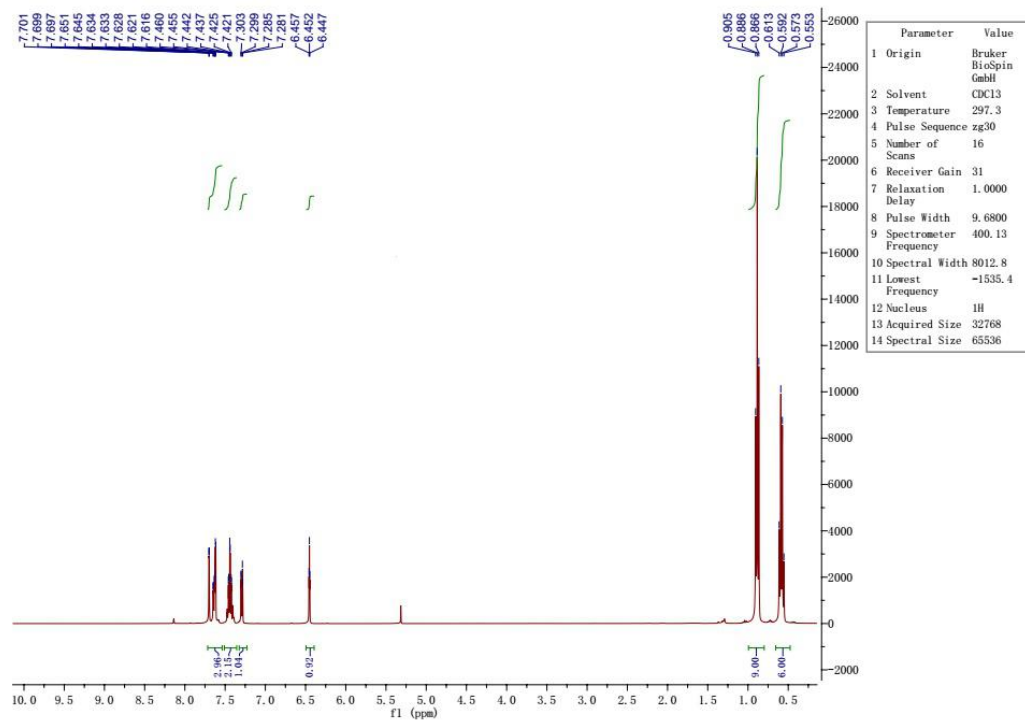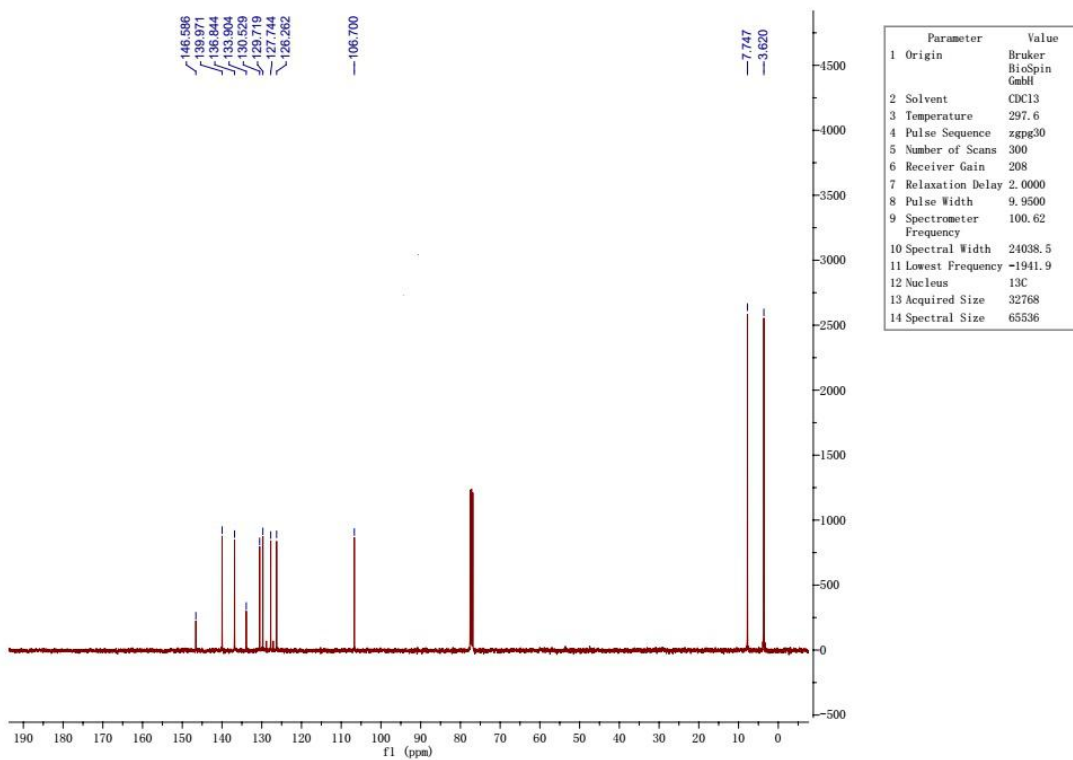



### 4-methyl-2-(2-(triethylsilyl)phenyl)thiazole (31)

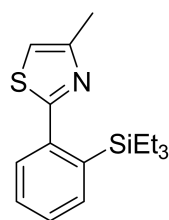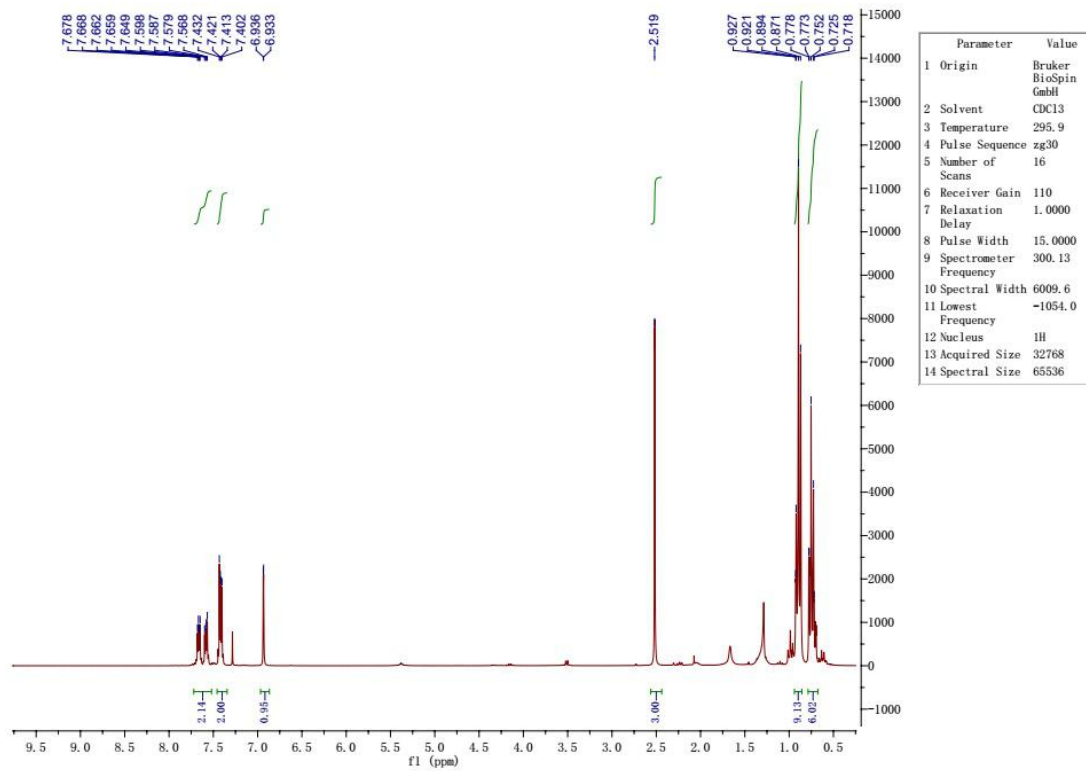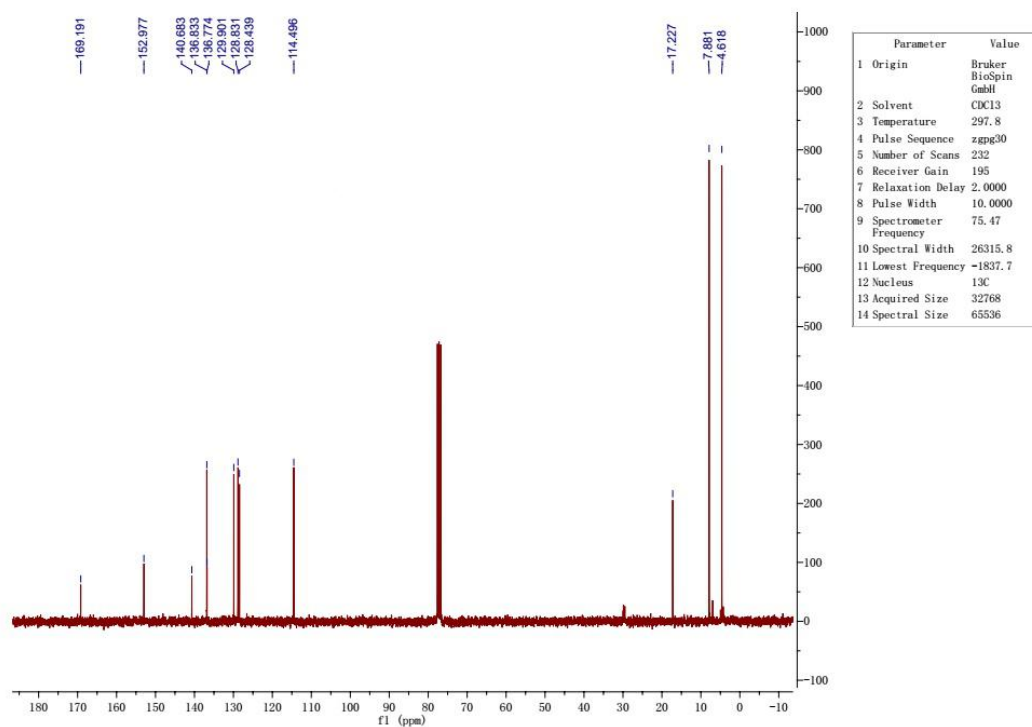

### 3-methyl-1-(2-(triethylsilyl)phenyl)-1H-pyrazole (3m)

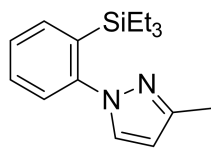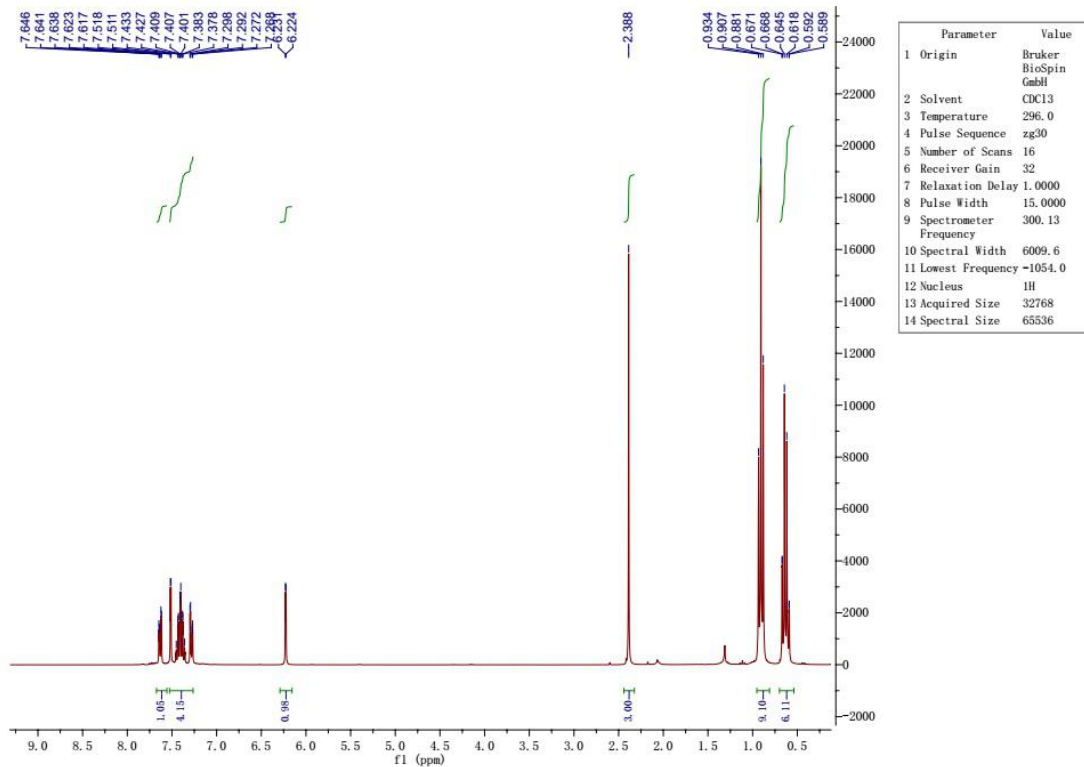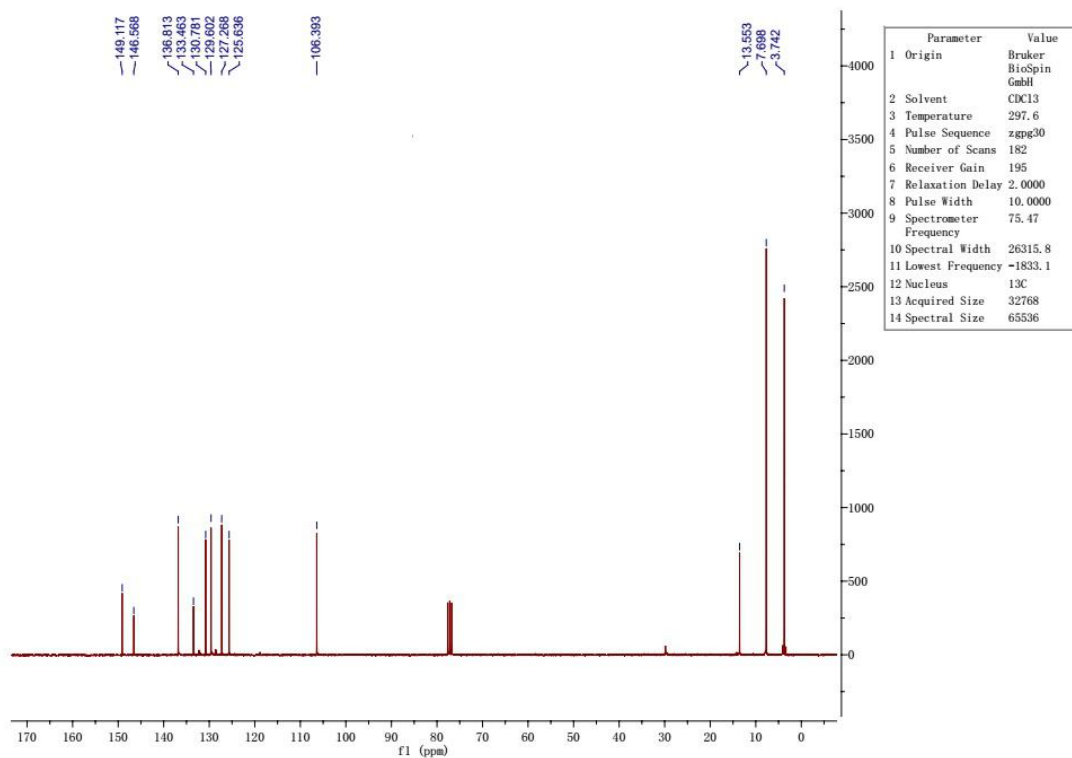

## 2-(2-(triethylsilyl)phenyl)-4,5-dihydrooxazole (3n)

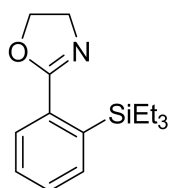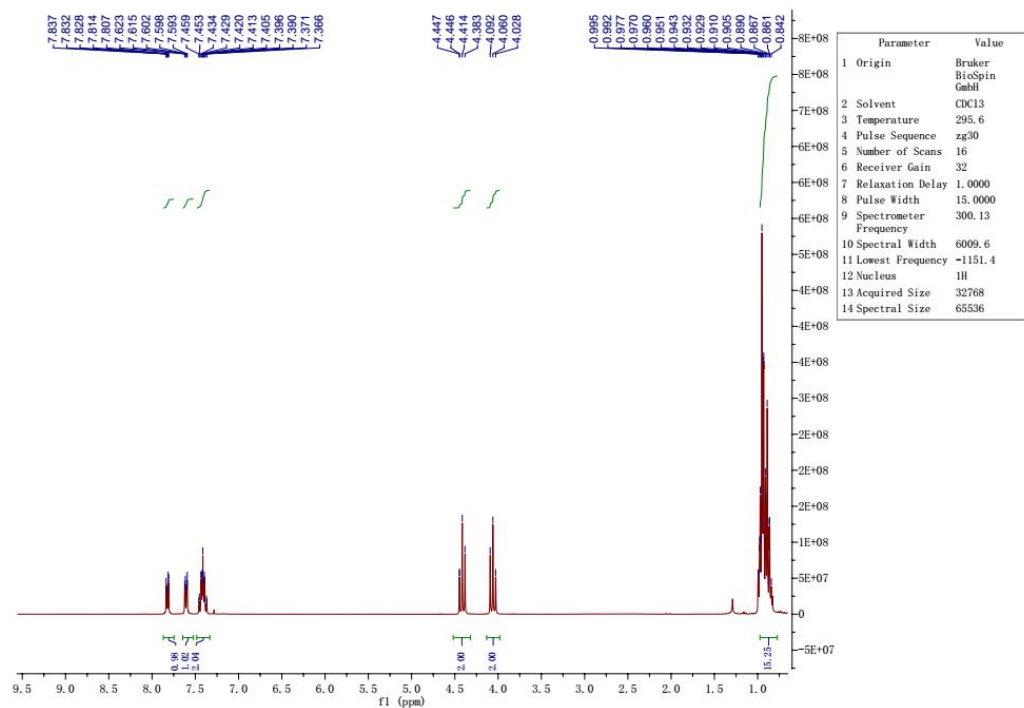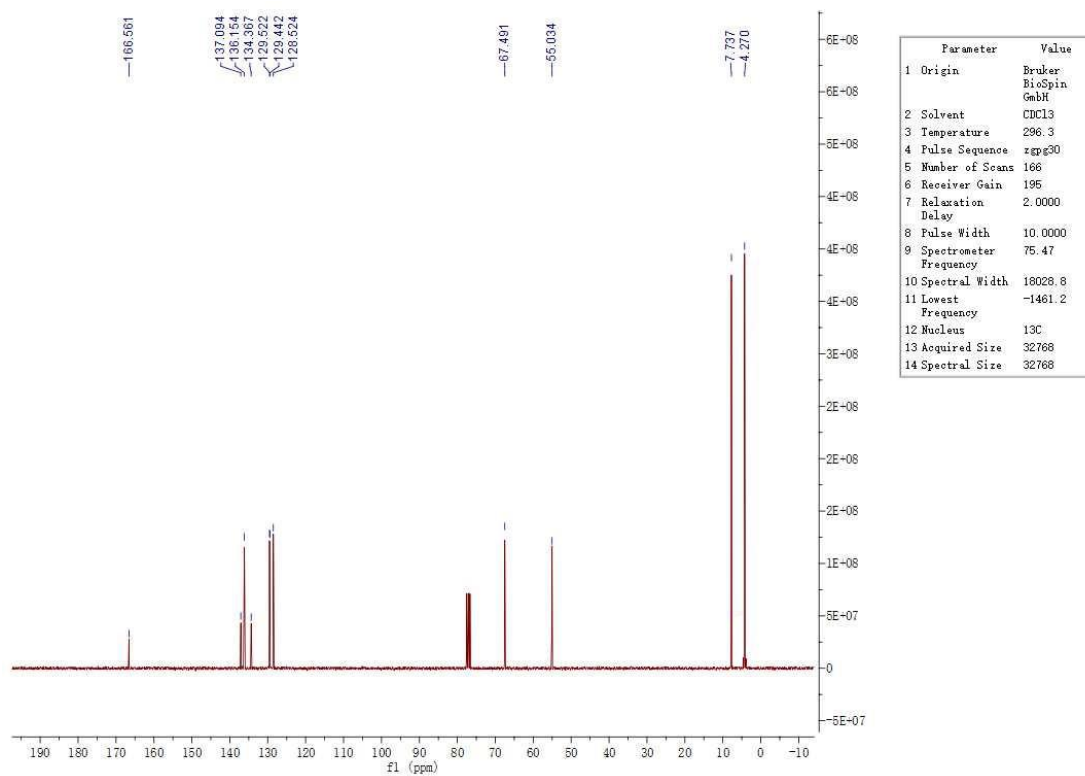

### 4,4-dimethyl-2-(2-(triethylsilyl)phenyl)-4,5-dihydrooxazole (3o)

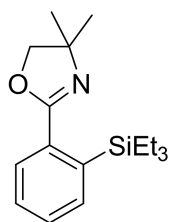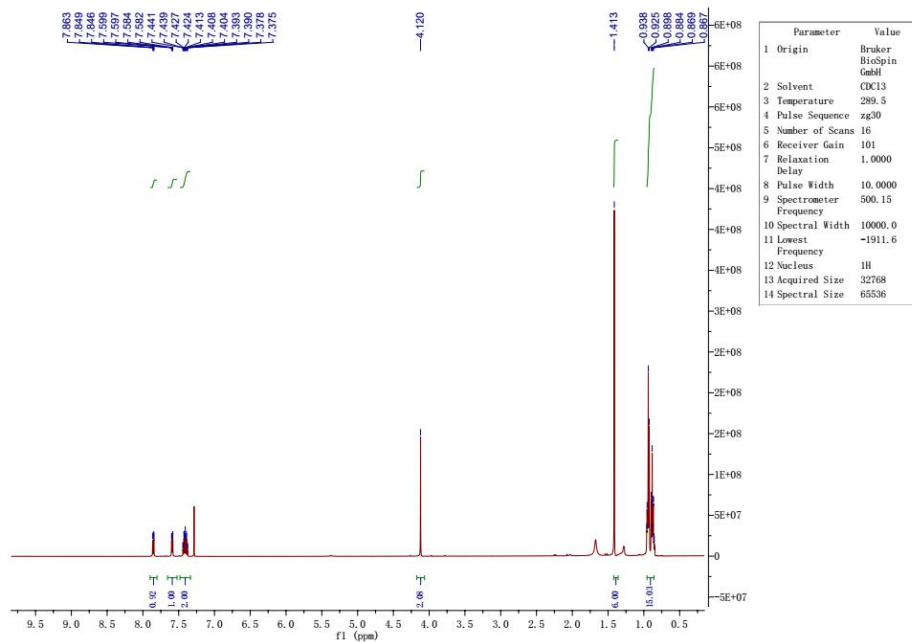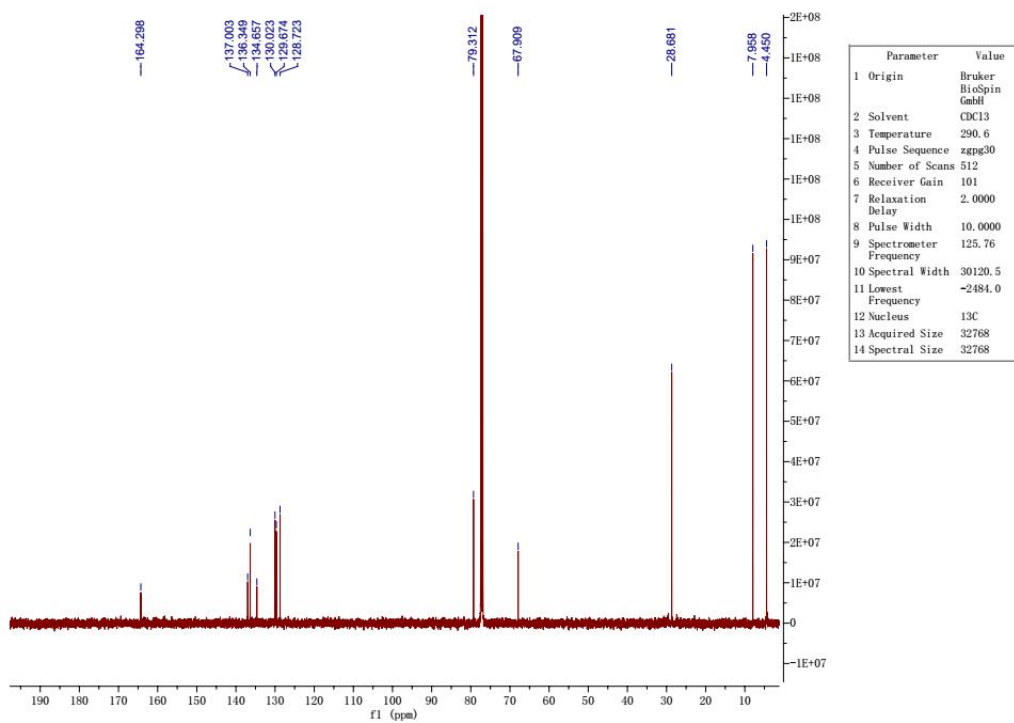

2-(2-(triethylsilyl)-5-methylphenyl)-4,5-dihydrooxazole (30)

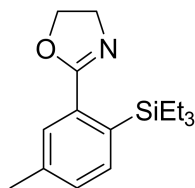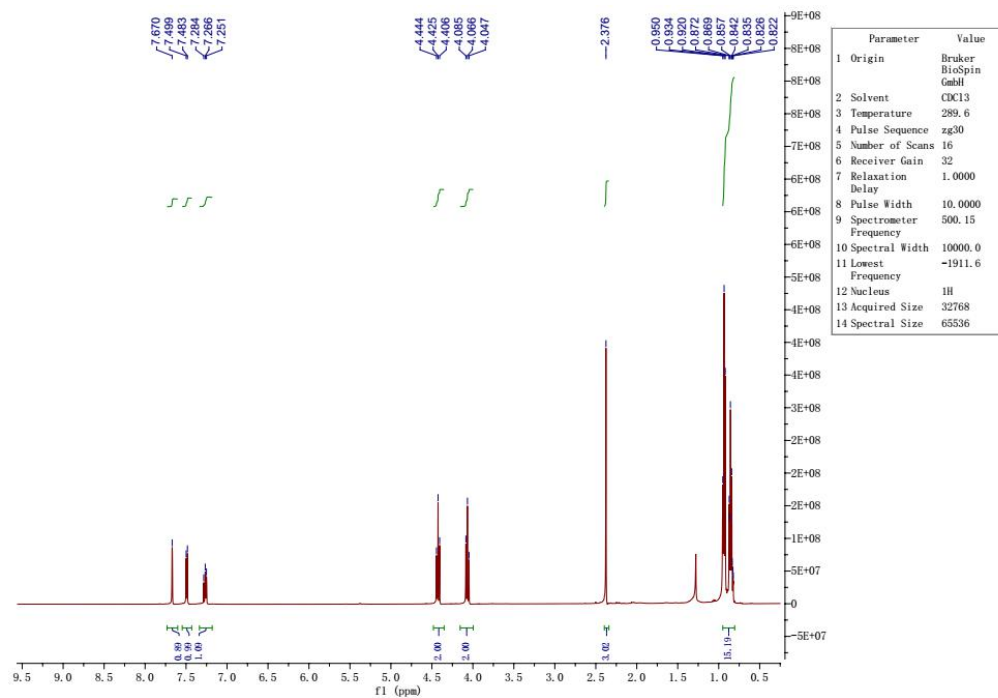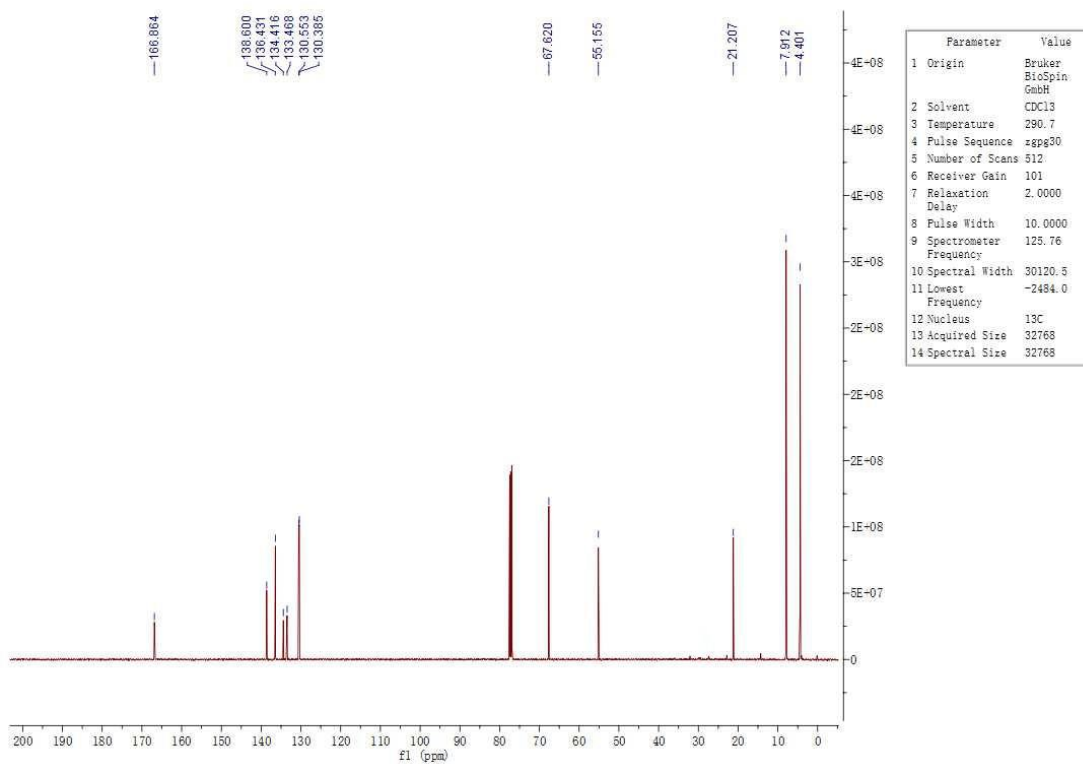

**methyl 3-(triethylsilyl)-4-(4,5-dihydrooxazol-2-yl)benzoate (3q)**

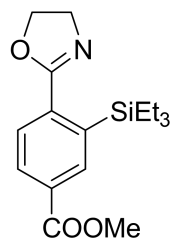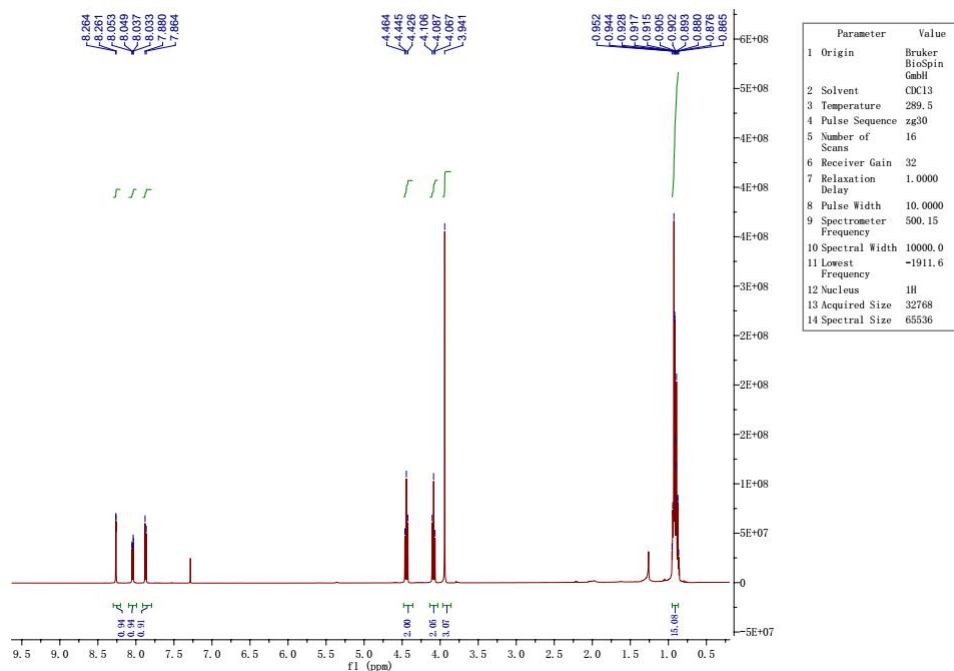

| Parameter                | Value               |
|--------------------------|---------------------|
| 1 Origin                 | Bruker BioSpin GmbH |
| 2 Solvent                | CDCl3               |
| 3 Temperature            | 299.5               |
| 4 Pulse Sequence         | zg30                |
| 5 Number of Scans        | 16                  |
| 6 Receiver Gain          | 32                  |
| 7 Relaxation Delay       | 1.0000              |
| 8 Pulse Width            | 10.0000             |
| 9 Spectrometer Frequency | 500.15              |
| 10 Spectral Width        | 10000.0             |
| 11 Lowest Frequency      | -1911.6             |
| 12 Nucleus               | 1H                  |
| 13 Acquired Size         | 32768               |
| 14 Spectral Size         | 65536               |

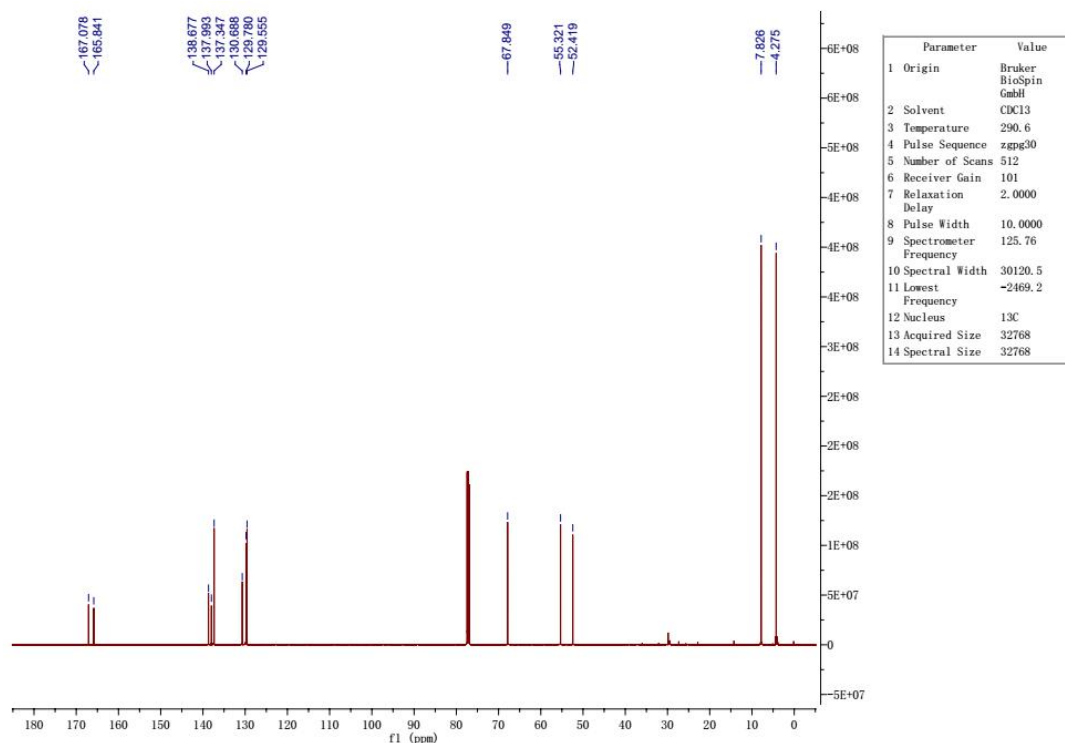

| Parameter                | Value               |
|--------------------------|---------------------|
| 1 Origin                 | Bruker BioSpin GmbH |
| 2 Solvent                | CDCl3               |
| 3 Temperature            | 290.6               |
| 4 Pulse Sequence         | zgpg30              |
| 5 Number of Scans        | 512                 |
| 6 Receiver Gain          | 101                 |
| 7 Relaxation Delay       | 2.0000              |
| 8 Pulse Width            | 10.0000             |
| 9 Spectrometer Frequency | 125.76              |
| 10 Spectral Width        | 30120.5             |
| 11 Lowest Frequency      | -2469.2             |
| 12 Nucleus               | 13C                 |
| 13 Acquired Size         | 32768               |
| 14 Spectral Size         | 32768               |

**Mixture of 2-(4-(methylthio)phenyl)-6-(((triethylsilyl)oxy)methyl)pyridine (4a) and 2-(4-(methylthio)-2-(triethylsilyl)phenyl)-6-(((triethylsilyl)oxy)methyl)pyridine (5a) (65:35)**

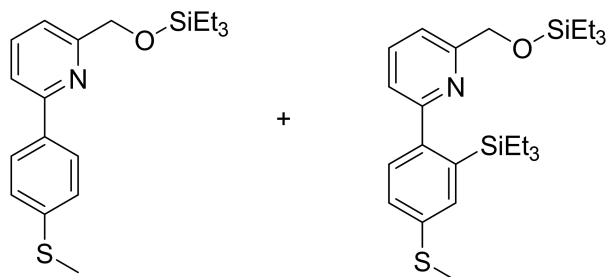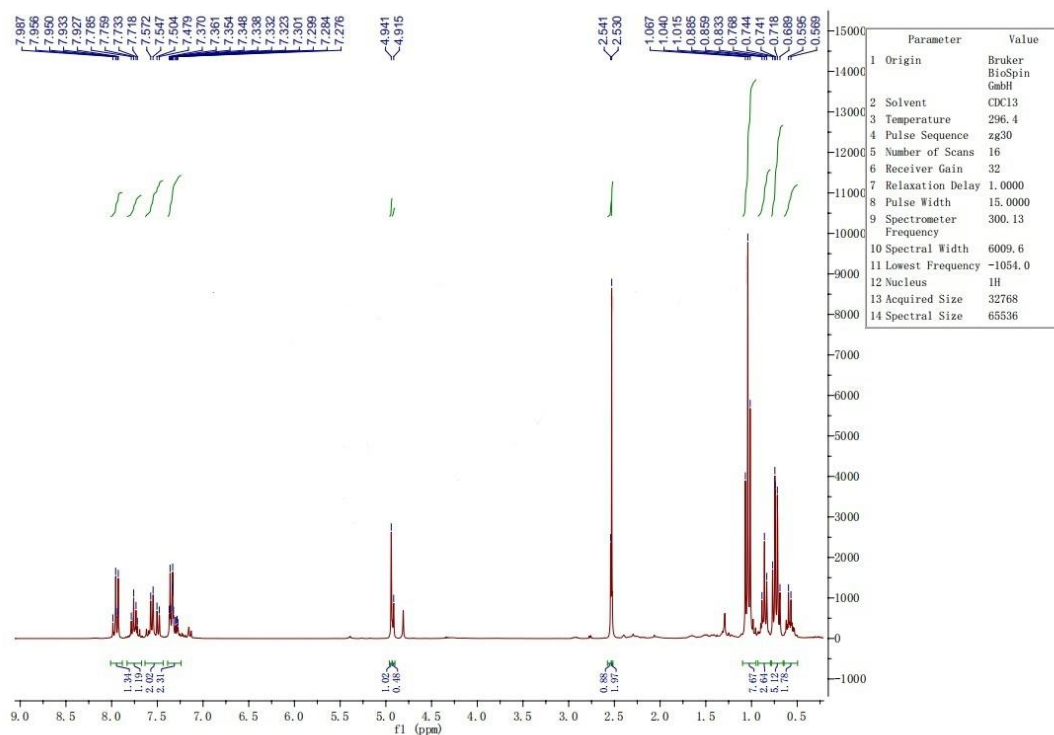

**Mixture of 1-(4-(((triethylsilyl)oxy)methyl)phenyl)-1H-pyrazole (4b) and 1-(2-(triethylsilyl)-4-(((triethylsilyl)oxy)methyl)phenyl)-1H-pyrazole (5b) (30:70)**

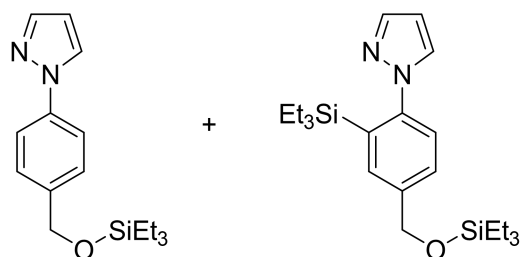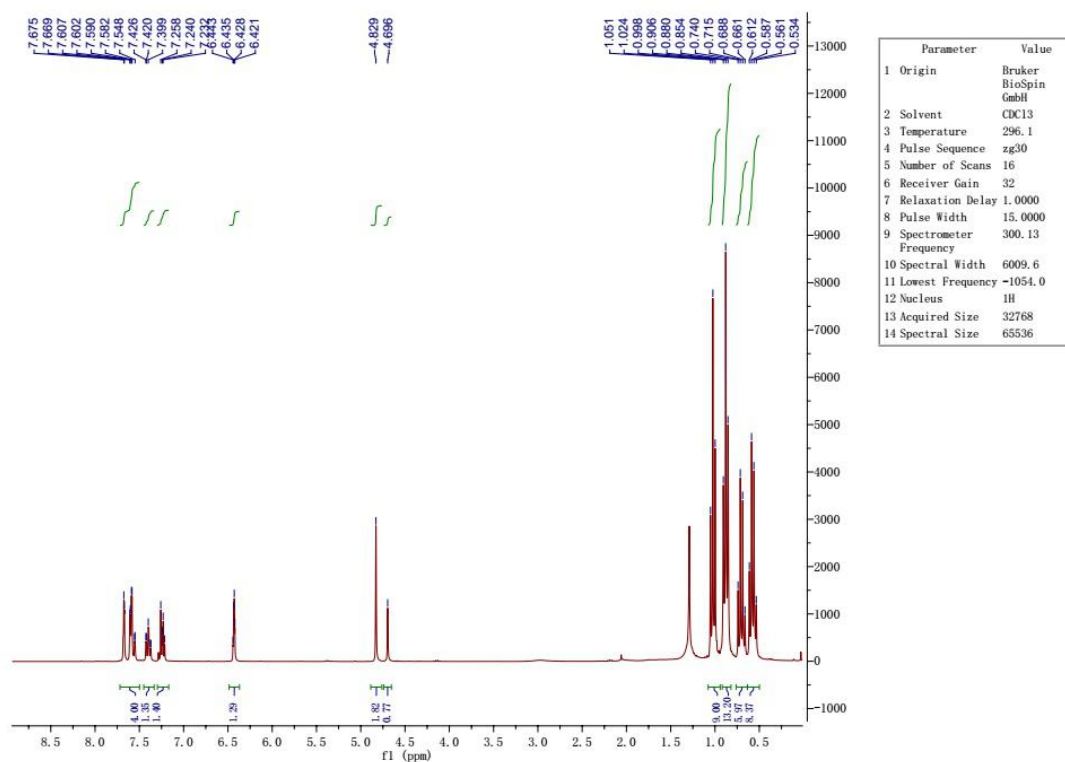



## 2-(4-((triethylsilyloxy)phenyl)pyridine (4c)

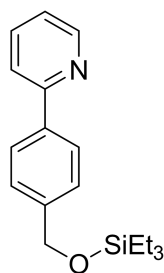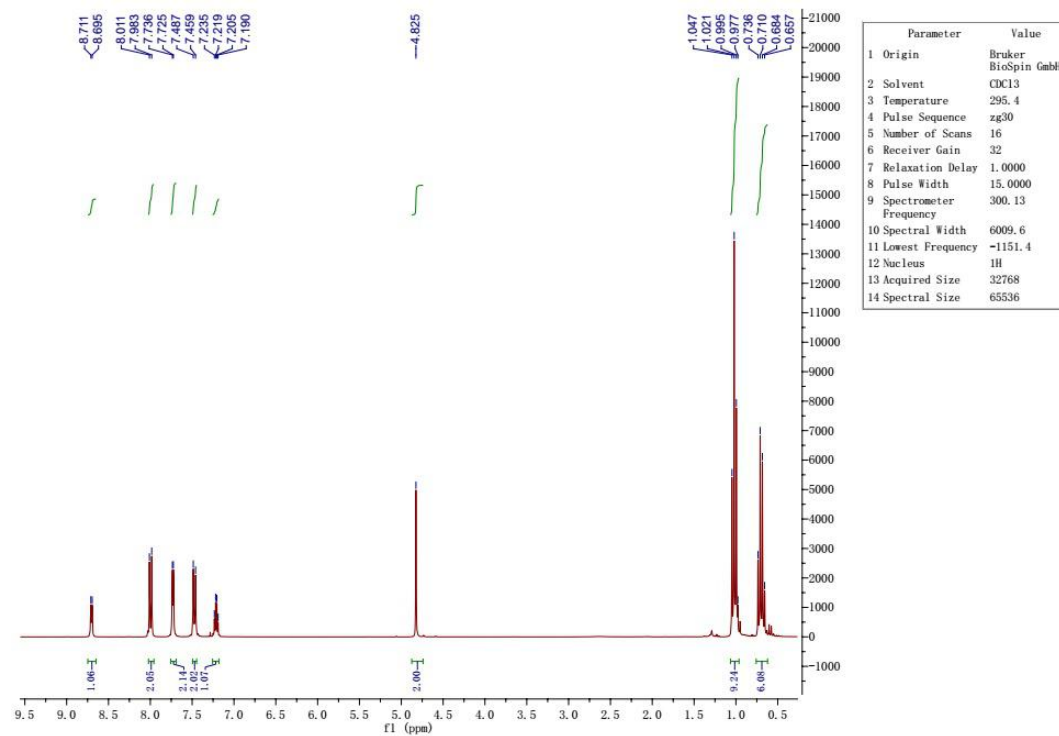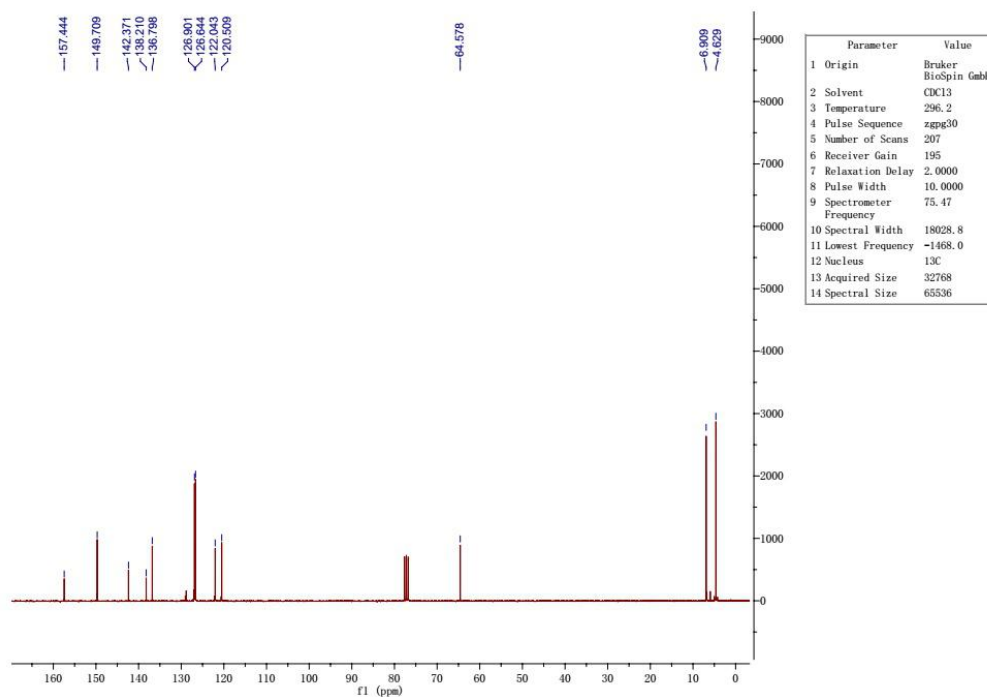

## 2-(2-(triethylsilyl)-4-((triethylsilyl)oxy)phenyl)pyridine (5c)

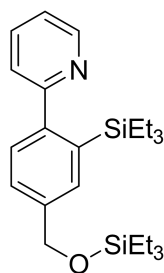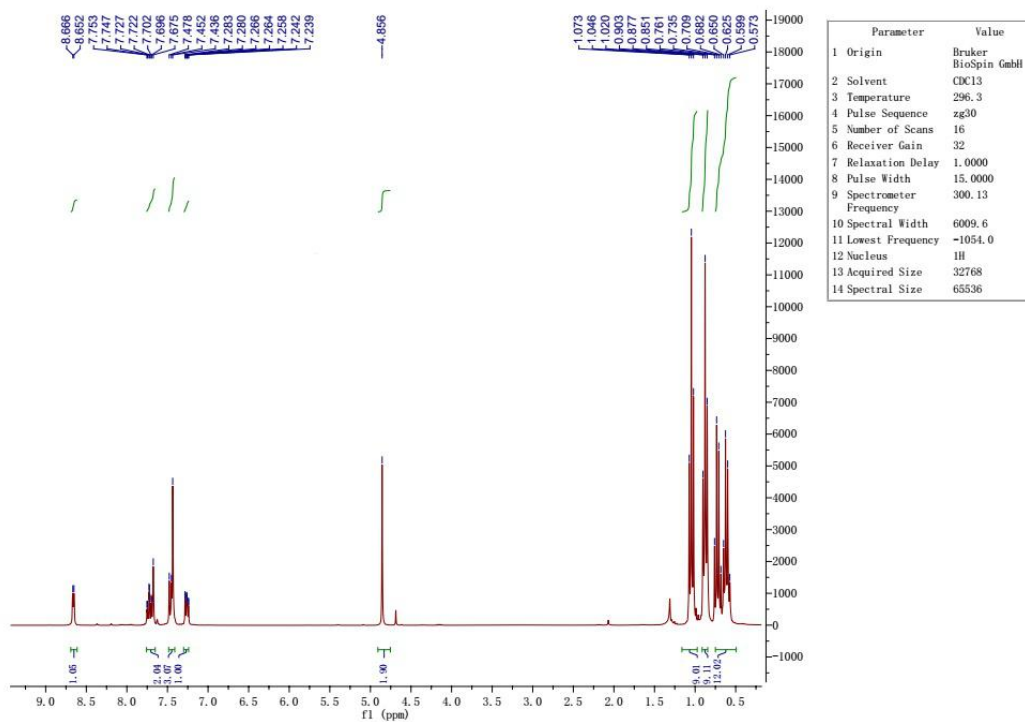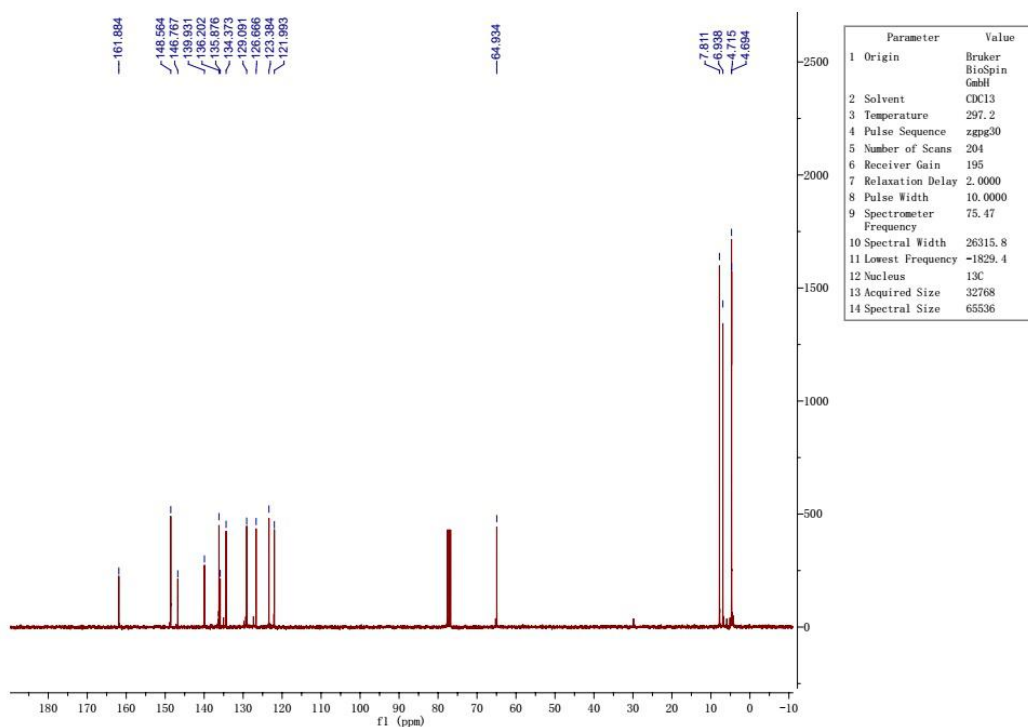

### 8-((triethylsilyl)methyl)quinoline (6)

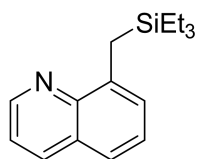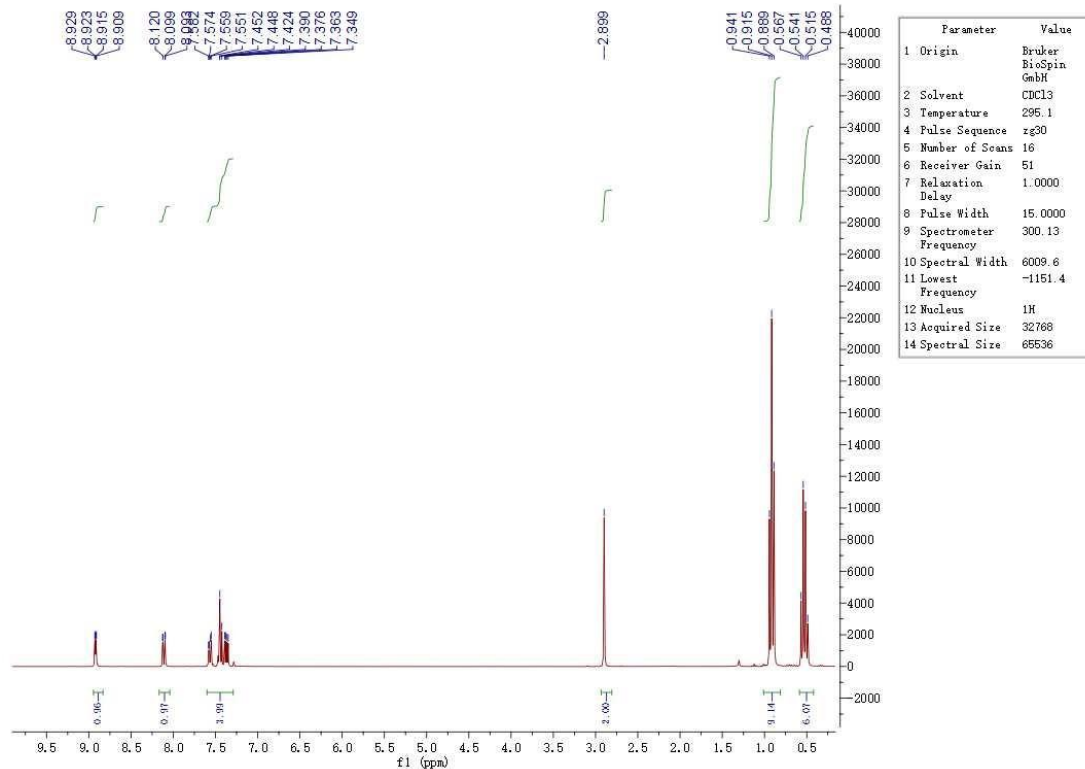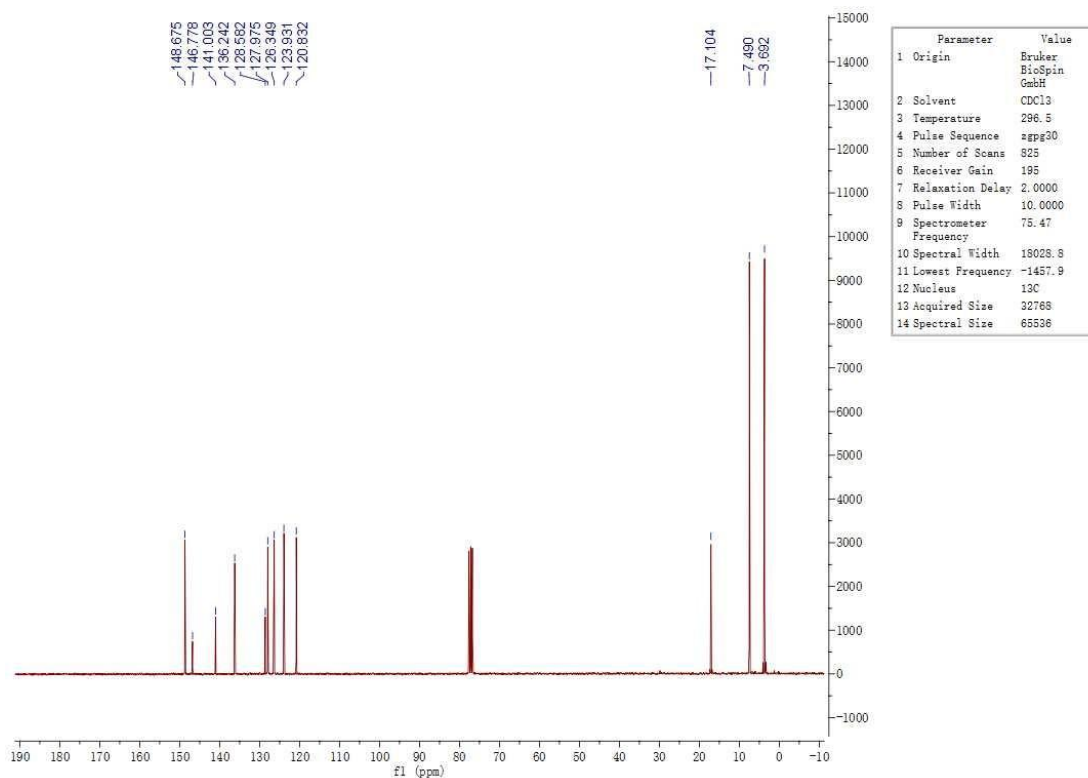

Supplement: c9ob00609e1.pdf [file c9ob00609e1.pdf]
